# Supplementary material for: Trapping para-Quinone Methide Intermediates with Ferrocene: Synthesis and Preliminary Biological Evaluation of New Phenol-Ferrocene Conjugates
Source: MDPI journal article supplement (doi:10.3390/molecules23061335), 2018-06-01

# checkCIF/PLATON report

Structure factors have been supplied for datablock(s) 3a

THIS REPORT IS FOR GUIDANCE ONLY. IF USED AS PART OF A REVIEW PROCEDURE FOR PUBLICATION, IT SHOULD NOT REPLACE THE EXPERTISE OF AN EXPERIENCED CRYSTALLOGRAPHIC REFEREE.

No syntax errors found.      CIF dictionary      Interpreting this report

## Datablock: 3a

---

|                 |                |                    |               |
|-----------------|----------------|--------------------|---------------|
| Bond precision: | C-C = 0.0108 Å | Wavelength=1.54184 |               |
| Cell:           | a=15.6620(12)  | b=6.0219(3)        | c=18.7859(11) |
|                 | alpha=90       | beta=96.990(6)     | gamma=90      |
| Temperature:    | 299 K          |                    |               |
|                 | Calculated     | Reported           |               |
| Volume          | 1758.62(19)    | 1758.6(2)          |               |
| Space group     | P 21/n         | P 21/n             |               |
| Hall group      | -P 2yn         | -P 2yn             |               |
| Moiety formula  | C23 H20 Fe O   | ?                  |               |
| Sum formula     | C23 H20 Fe O   | C23 H20 Fe O       |               |
| Mr              | 368.24         | 368.24             |               |
| Dx,g cm-3       | 1.391          | 1.391              |               |
| Z               | 4              | 4                  |               |
| Mu (mm-1)       | 6.911          | 6.911              |               |
| F000            | 768.0          | 768.0              |               |
| F000'           | 765.33         |                    |               |
| h,k,lmax        | 19,7,22        | 18,7,22            |               |
| Nref            | 3307           | 3254               |               |
| Tmin,Tmax       | 0.498,0.871    | 0.675,1.000        |               |
| Tmin'           | 0.120          |                    |               |

Correction method= # Reported T Limits: Tmin=0.675 Tmax=1.000  
AbsCorr = MULTI-SCAN

Data completeness= 0.984      Theta(max)= 69.596

R(reflections)= 0.0789( 2641)      wR2(reflections)= 0.2554( 3254)

S = 1.118      Npar= 238

---

The following ALERTS were generated. Each ALERT has the format

**test-name\_ALERT\_alert-type\_alert-level.**

Click on the hyperlinks for more details of the test.

---

### Alert level B

PLAT420\_ALERT\_2\_B D-H Without Acceptor            O4            --H40            Please Check  
PLAT930\_ALERT\_2\_B Check Twin Law ( 1 0 1 ) [ 4 0 3 ] Estimated BASF            0.28

---

### Alert level C

PLAT084\_ALERT\_3\_C High wR2 Value (i.e. > 0.25) ..... 0.26 Report  
PLAT241\_ALERT\_2\_C High 'MainMol' Ueq as Compared to Neighbors of            C14 Check  
PLAT242\_ALERT\_2\_C Low 'MainMol' Ueq as Compared to Neighbors of            Fe1 Check  
PLAT341\_ALERT\_3\_C Low Bond Precision on C-C Bonds ..... 0.01076 Ang.  
PLAT906\_ALERT\_3\_C Large K Value in the Analysis of Variance ..... 3.633 Check  
PLAT906\_ALERT\_3\_C Large K Value in the Analysis of Variance ..... 2.054 Check  
PLAT911\_ALERT\_3\_C Missing FCF Refl Between Thmin & STh/L=    0.600            5 Report  
PLAT934\_ALERT\_3\_C Number of (Iobs-Icalc)/SigmaW > 10 Outliers .... 1 Check

---

### Alert level G

PLAT007\_ALERT\_5\_G Number of Unrefined Donor-H Atoms ..... 2 Report  
PLAT072\_ALERT\_2\_G SHELXL First Parameter in WGHT Unusually Large            0.12 Report  
PLAT301\_ALERT\_3\_G Main Residue Disorder .....(Resd 1 )            4% Note  
PLAT793\_ALERT\_4\_G Model has Chirality at C7            (Centro SPGR)            R Verify  
PLAT794\_ALERT\_5\_G Tentative Bond Valency for Fe1            (II)            2.13 Info  
PLAT870\_ALERT\_4\_G ALERTS Related to Twinning Effects Suppressed ..            ! Info  
PLAT912\_ALERT\_4\_G Missing # of FCF Reflections Above STh/L=    0.600            47 Note  
PLAT931\_ALERT\_5\_G Found Twin Law ( 1 0 1 ) [            ] Est. BASF            0.28 Check

---

0 **ALERT level A** = Most likely a serious problem - resolve or explain  
2 **ALERT level B** = A potentially serious problem, consider carefully  
8 **ALERT level C** = Check. Ensure it is not caused by an omission or oversight  
8 **ALERT level G** = General information/check it is not something unexpected

0 ALERT type 1 CIF construction/syntax error, inconsistent or missing data  
5 ALERT type 2 Indicator that the structure model may be wrong or deficient  
7 ALERT type 3 Indicator that the structure quality may be low  
3 ALERT type 4 Improvement, methodology, query or suggestion  
3 ALERT type 5 Informative message, check

---

---

It is advisable to attempt to resolve as many as possible of the alerts in all categories. Often the minor alerts point to easily fixed oversights, errors and omissions in your CIF or refinement strategy, so attention to these fine details can be worthwhile. In order to resolve some of the more serious problems it may be necessary to carry out additional measurements or structure refinements. However, the purpose of your study may justify the reported deviations and the more serious of these should normally be commented upon in the discussion or experimental section of a paper or in the "special\_details" fields of the CIF. checkCIF was carefully designed to identify outliers and unusual parameters, but every test has its limitations and alerts that are not important in a particular case may appear. Conversely, the absence of alerts does not guarantee there are no aspects of the results needing attention. It is up to the individual to critically assess their own results and, if necessary, seek expert advice.

### **Publication of your CIF in IUCr journals**

A basic structural check has been run on your CIF. These basic checks will be run on all CIFs submitted for publication in IUCr journals (*Acta Crystallographica*, *Journal of Applied Crystallography*, *Journal of Synchrotron Radiation*); however, if you intend to submit to *Acta Crystallographica Section C* or *E* or *IUCrData*, you should make sure that full publication checks are run on the final version of your CIF prior to submission.

### **Publication of your CIF in other journals**

Please refer to the *Notes for Authors* of the relevant journal for any special instructions relating to CIF submission.

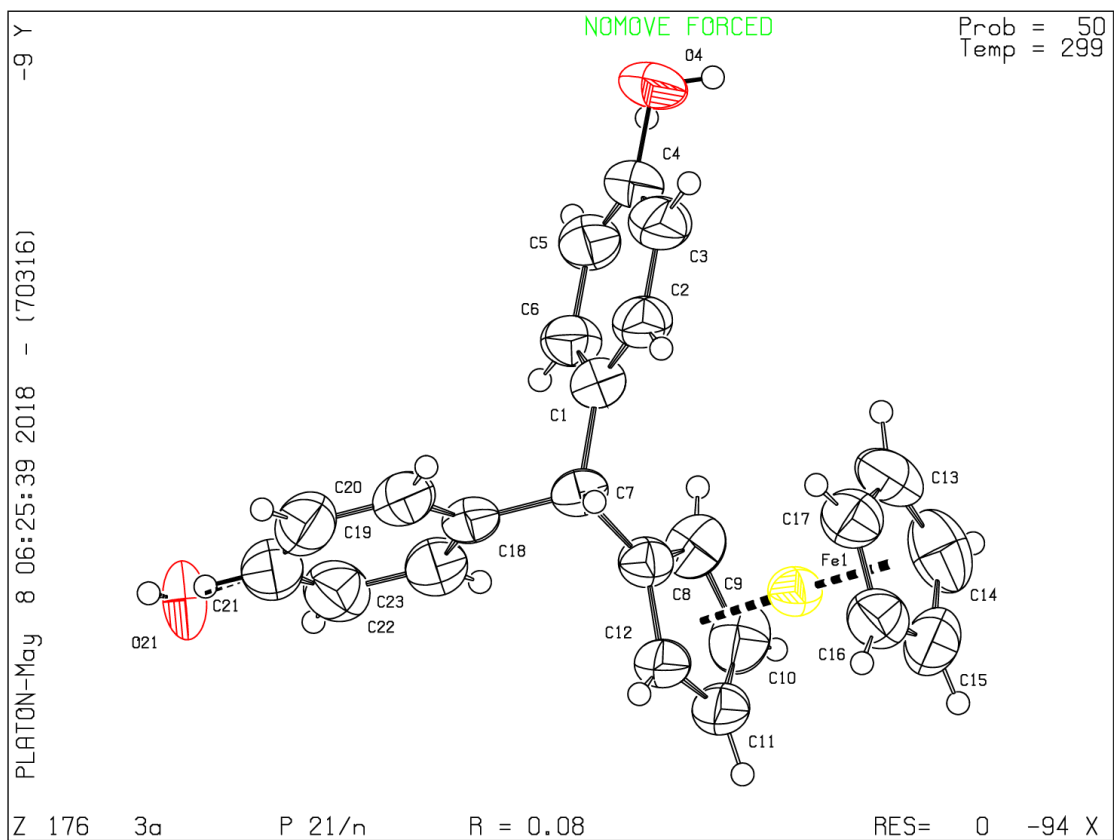

Supplement: s1 [file s1]
