# Supplementary material for: Trapping para-Quinone Methide Intermediates with Ferrocene: Synthesis and Preliminary Biological Evaluation of New Phenol-Ferrocene Conjugates
Source: MDPI journal article supplement (doi:10.3390/molecules23061335), 2018-06-01
Supplement: s1 [file s1]

## Supplementary Materials

### Trapping *para*-Quinone Methide Intermediates with Ferrocene: Synthesis and Preliminary Biological Evaluation of New Phenol-Ferrocene Conjugates

Silvia González-Pelayo, Enol López, Javier Borge, Noemí de-los-Santos-Álvarez and Luis A. López\*

#### TABLE OF CONTENTS:

|                   |                                                                                                                                               |
|-------------------|-----------------------------------------------------------------------------------------------------------------------------------------------|
| <b>Figure S1</b>  | $^1\text{H}$ -NMR (300 MHz, $\text{CDCl}_3$ ) and $^{13}\text{C}$ -NMR (75 MHz, $\text{CDCl}_3$ ) spectra of ferrocene derivative <b>3a</b> . |
| <b>Figure S2</b>  | $^1\text{H}$ -NMR (300 MHz, $\text{CDCl}_3$ ) and $^{13}\text{C}$ -NMR (75 MHz, $\text{CDCl}_3$ ) spectra of ferrocene derivative <b>3b</b> . |
| <b>Figure S3</b>  | $^1\text{H}$ -NMR (300 MHz, $\text{CDCl}_3$ ) and $^{13}\text{C}$ -NMR (75 MHz, $\text{CDCl}_3$ ) spectra of ferrocene derivative <b>3c</b> . |
| <b>Figure S4</b>  | $^1\text{H}$ -NMR (300 MHz, $\text{CDCl}_3$ ) and $^{13}\text{C}$ -NMR (75 MHz, $\text{CDCl}_3$ ) spectra of ferrocene derivative <b>3d</b> . |
| <b>Figure S5</b>  | $^1\text{H}$ -NMR (300 MHz, $\text{CDCl}_3$ ) and $^{13}\text{C}$ -NMR (75 MHz, $\text{CDCl}_3$ ) spectra of ferrocene derivative <b>3e</b> . |
| <b>Figure S6</b>  | $^1\text{H}$ -NMR (300 MHz, $\text{CDCl}_3$ ) and $^{13}\text{C}$ -NMR (75 MHz, $\text{CDCl}_3$ ) spectra of ferrocene derivative <b>3f</b> . |
| <b>Figure S7</b>  | $^1\text{H}$ -NMR (300 MHz, $\text{CDCl}_3$ ) and $^{13}\text{C}$ -NMR (75 MHz, $\text{CDCl}_3$ ) spectra of ferrocene derivative <b>3g</b> . |
| <b>Figure S8</b>  | $^1\text{H}$ -NMR (300 MHz, $\text{CDCl}_3$ ) and $^{13}\text{C}$ -NMR (75 MHz, $\text{CDCl}_3$ ) spectra of ferrocene derivative <b>3h</b> . |
| <b>Figure S9</b>  | $^1\text{H}$ -NMR (300 MHz, $\text{CDCl}_3$ ) and $^{13}\text{C}$ -NMR (75 MHz, $\text{CDCl}_3$ ) spectra of ferrocene derivative <b>3i</b> . |
| <b>Figure S10</b> | $^1\text{H}$ -NMR (300 MHz, $\text{CDCl}_3$ ) and $^{13}\text{C}$ -NMR (75 MHz, $\text{CDCl}_3$ ) spectra of ferrocene derivative <b>3j</b> . |
| <b>Figure S11</b> | $^1\text{H}$ -NMR (300 MHz, $\text{CDCl}_3$ ) and $^{13}\text{C}$ -NMR (75 MHz, $\text{CDCl}_3$ ) spectra of ferrocene derivative <b>3k</b> . |
| <b>Figure S12</b> | $^1\text{H}$ -NMR (300 MHz, $\text{CDCl}_3$ ) and $^{13}\text{C}$ -NMR (75 MHz, $\text{CDCl}_3$ ) spectra of ferrocene derivative <b>3l</b> . |
| <b>Figure S13</b> | $^1\text{H}$ -NMR (300 MHz, $\text{CDCl}_3$ ) and $^{13}\text{C}$ -NMR (75 MHz, $\text{CDCl}_3$ ) spectra of ferrocene derivative <b>5</b> .  |

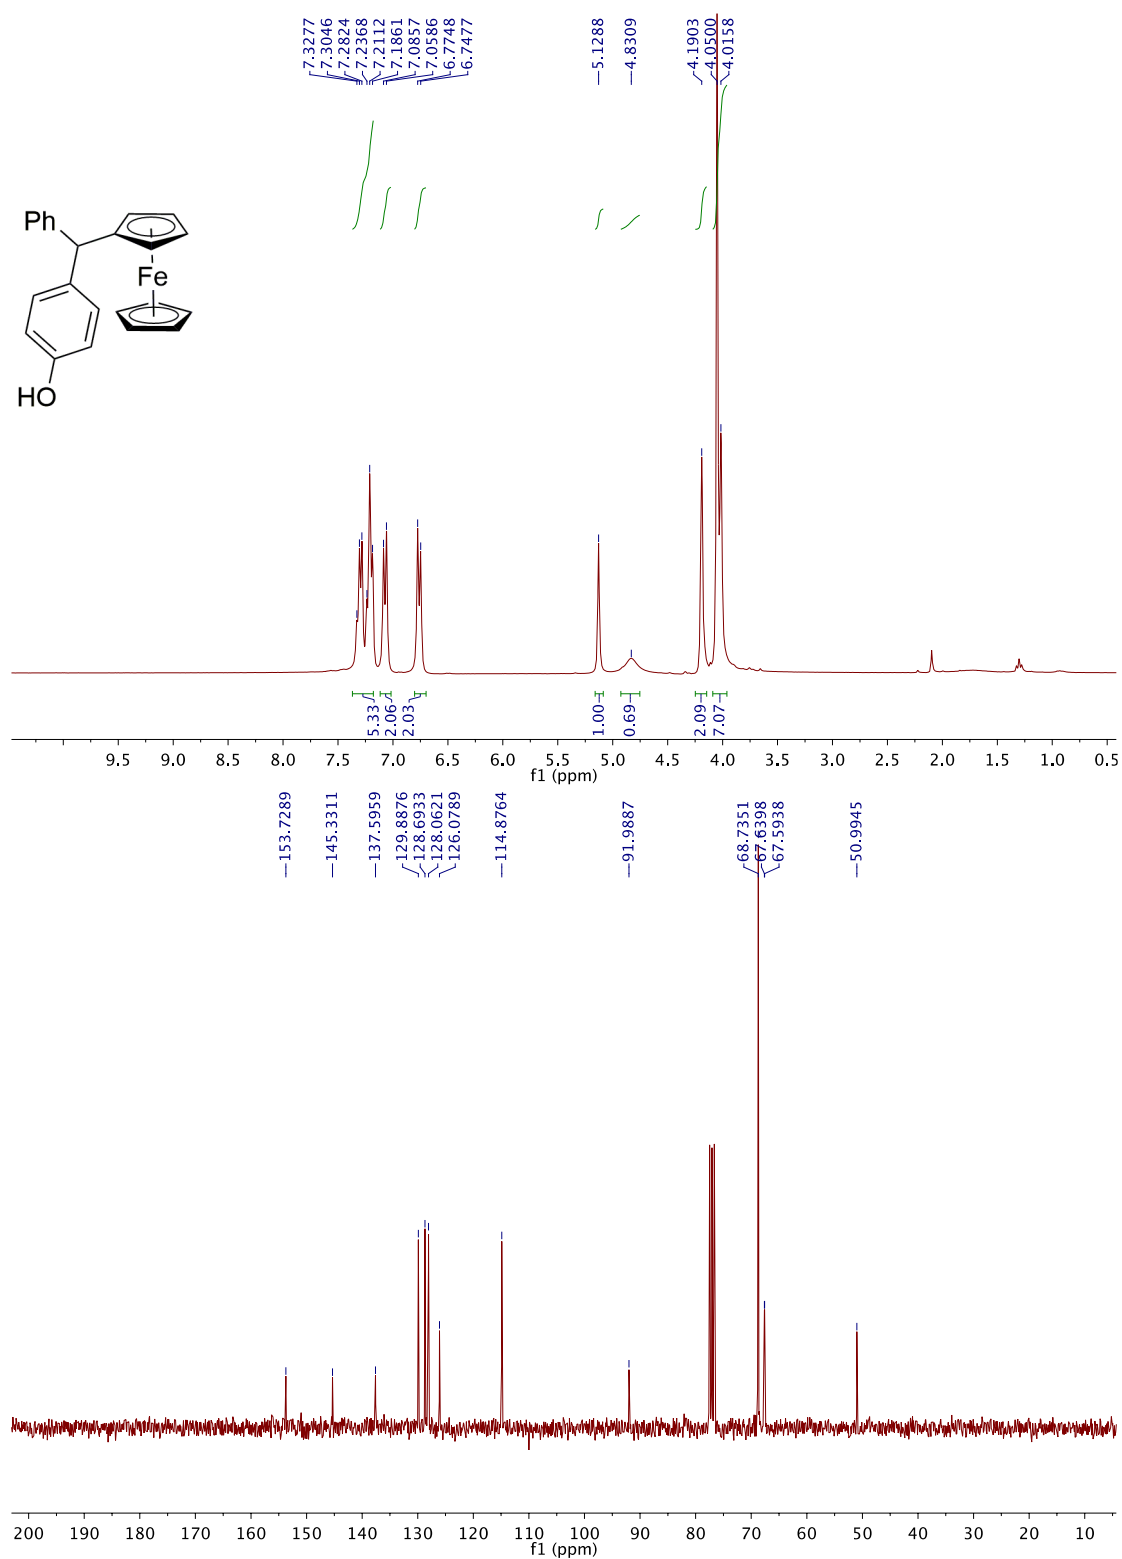

**Figure S1.** <sup>1</sup>H-NMR (300 MHz, CDCl<sub>3</sub>) and <sup>13</sup>C-NMR (75 MHz, CDCl<sub>3</sub>) spectra of ferrocene derivative **3a**.

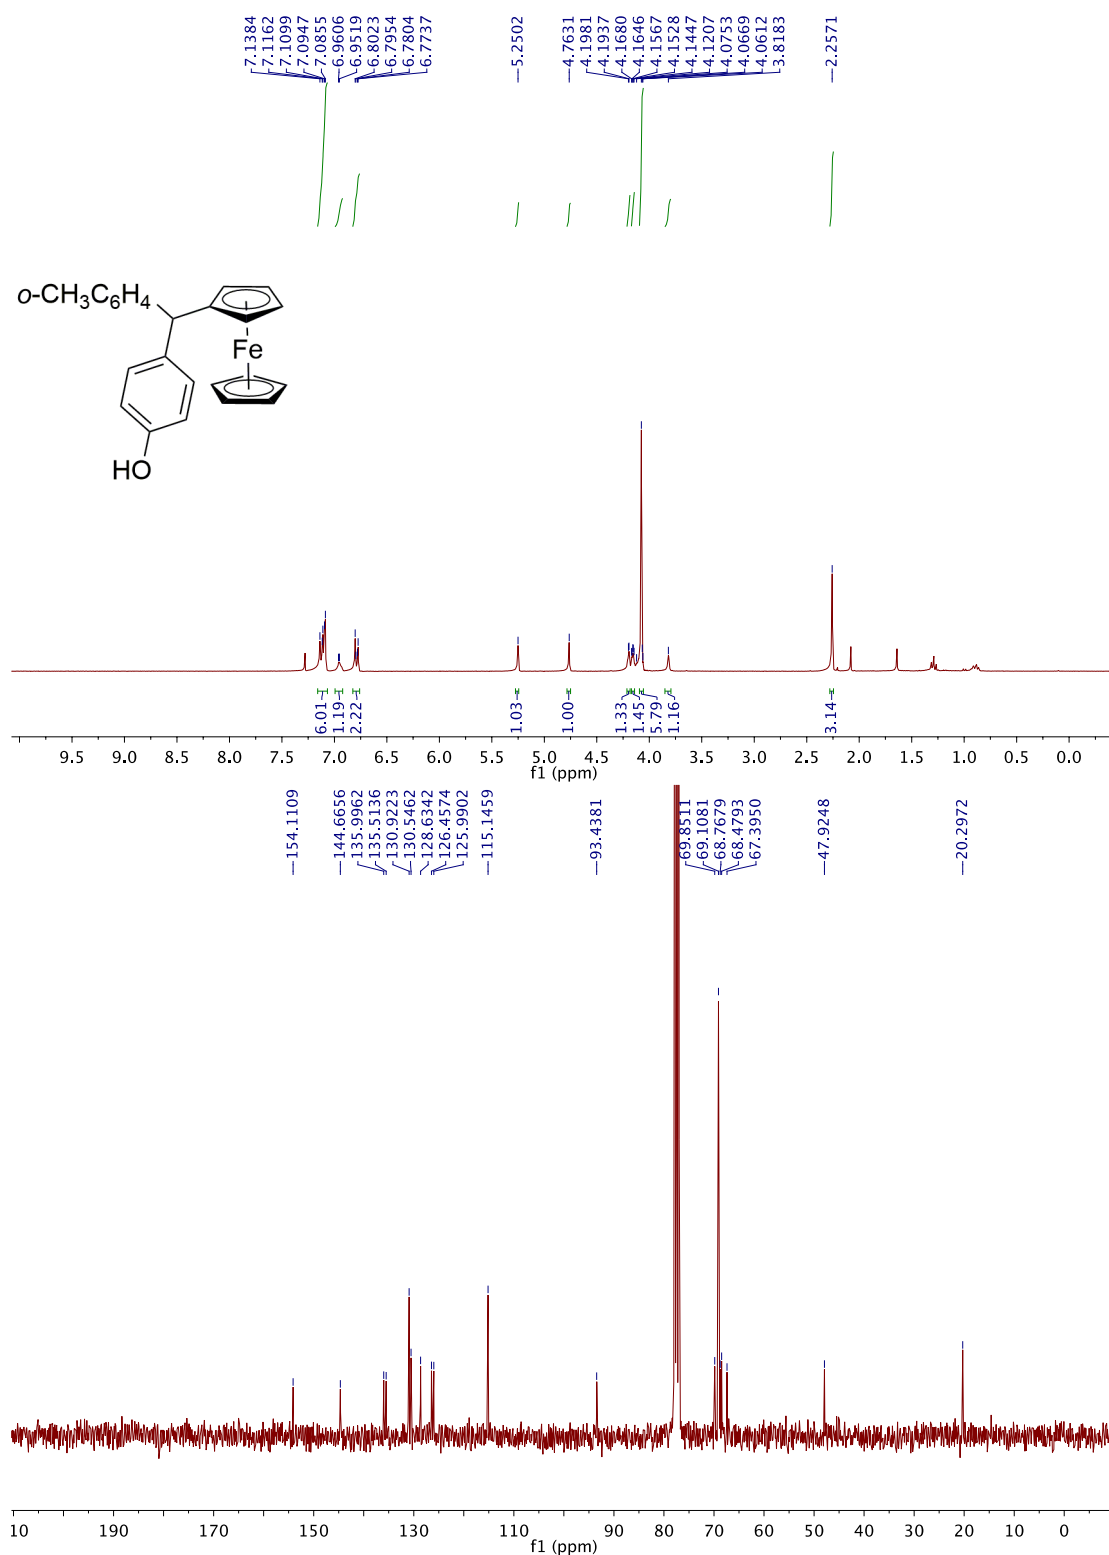

**Figure S2.** <sup>1</sup>H-NMR (300 MHz, CDCl<sub>3</sub>) and <sup>13</sup>C-NMR (75 MHz, CDCl<sub>3</sub>) spectra of ferrocene derivative **3b**.

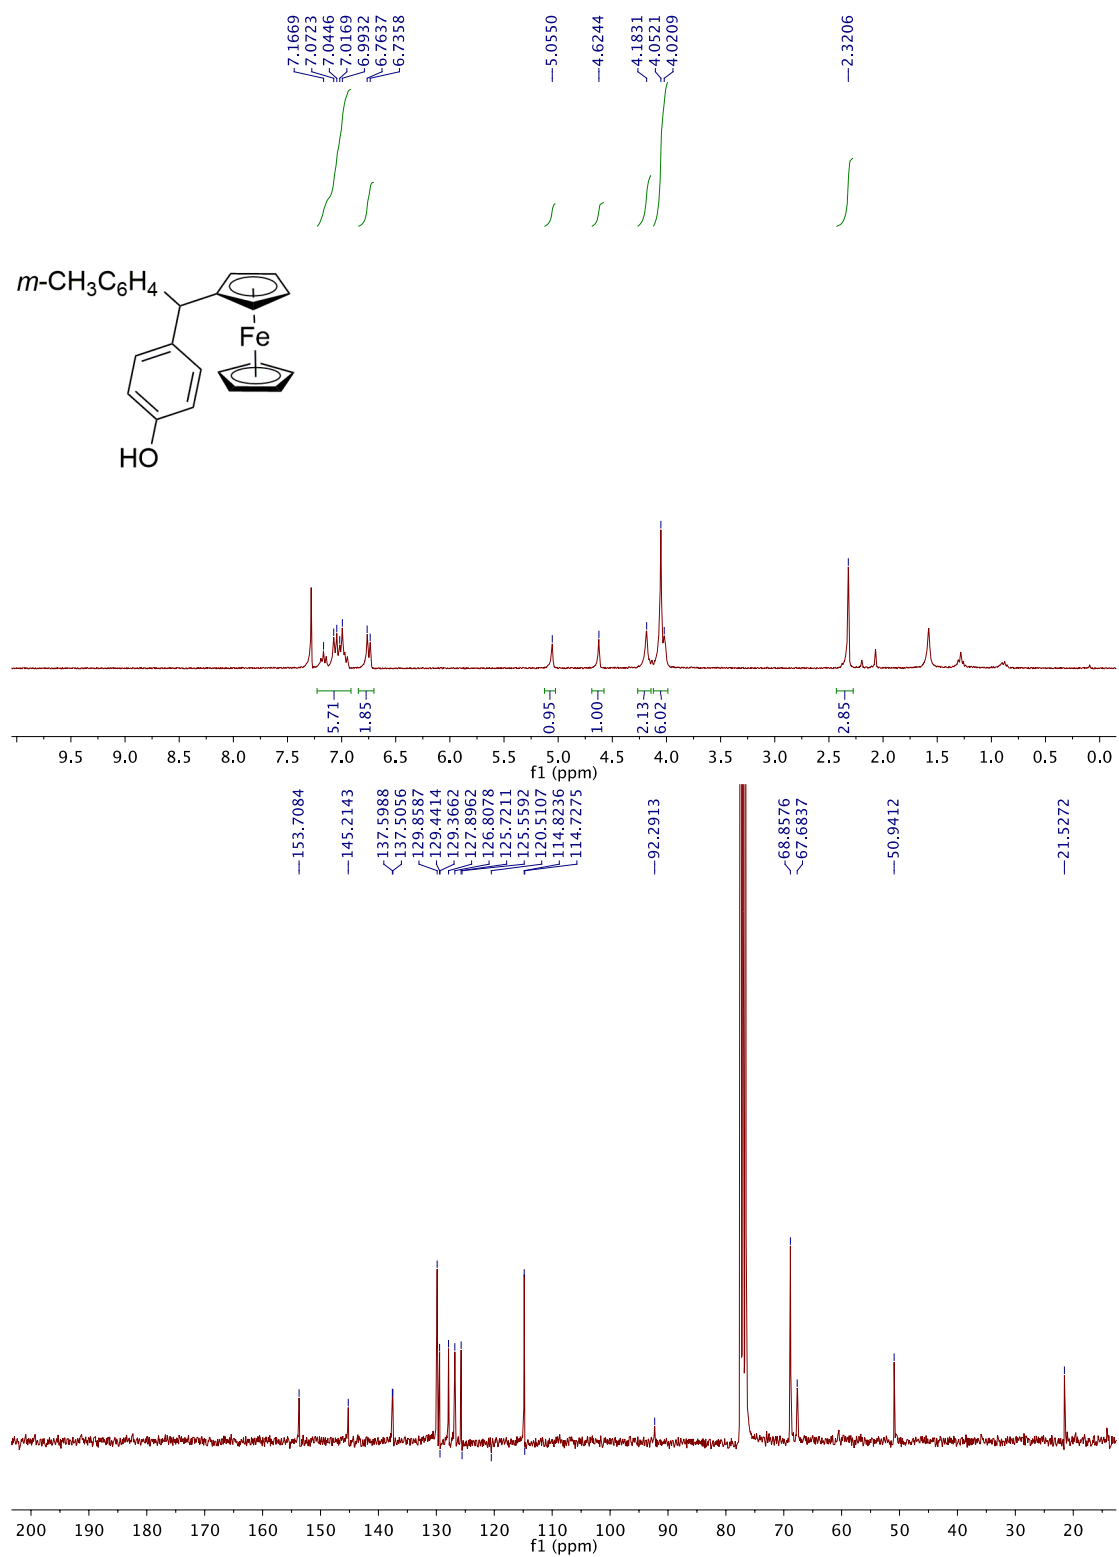

**Figure S3.** <sup>1</sup>H-NMR (300 MHz, CDCl<sub>3</sub>) and <sup>13</sup>C-NMR (75 MHz, CDCl<sub>3</sub>) spectra of ferrocene derivative **3c**.

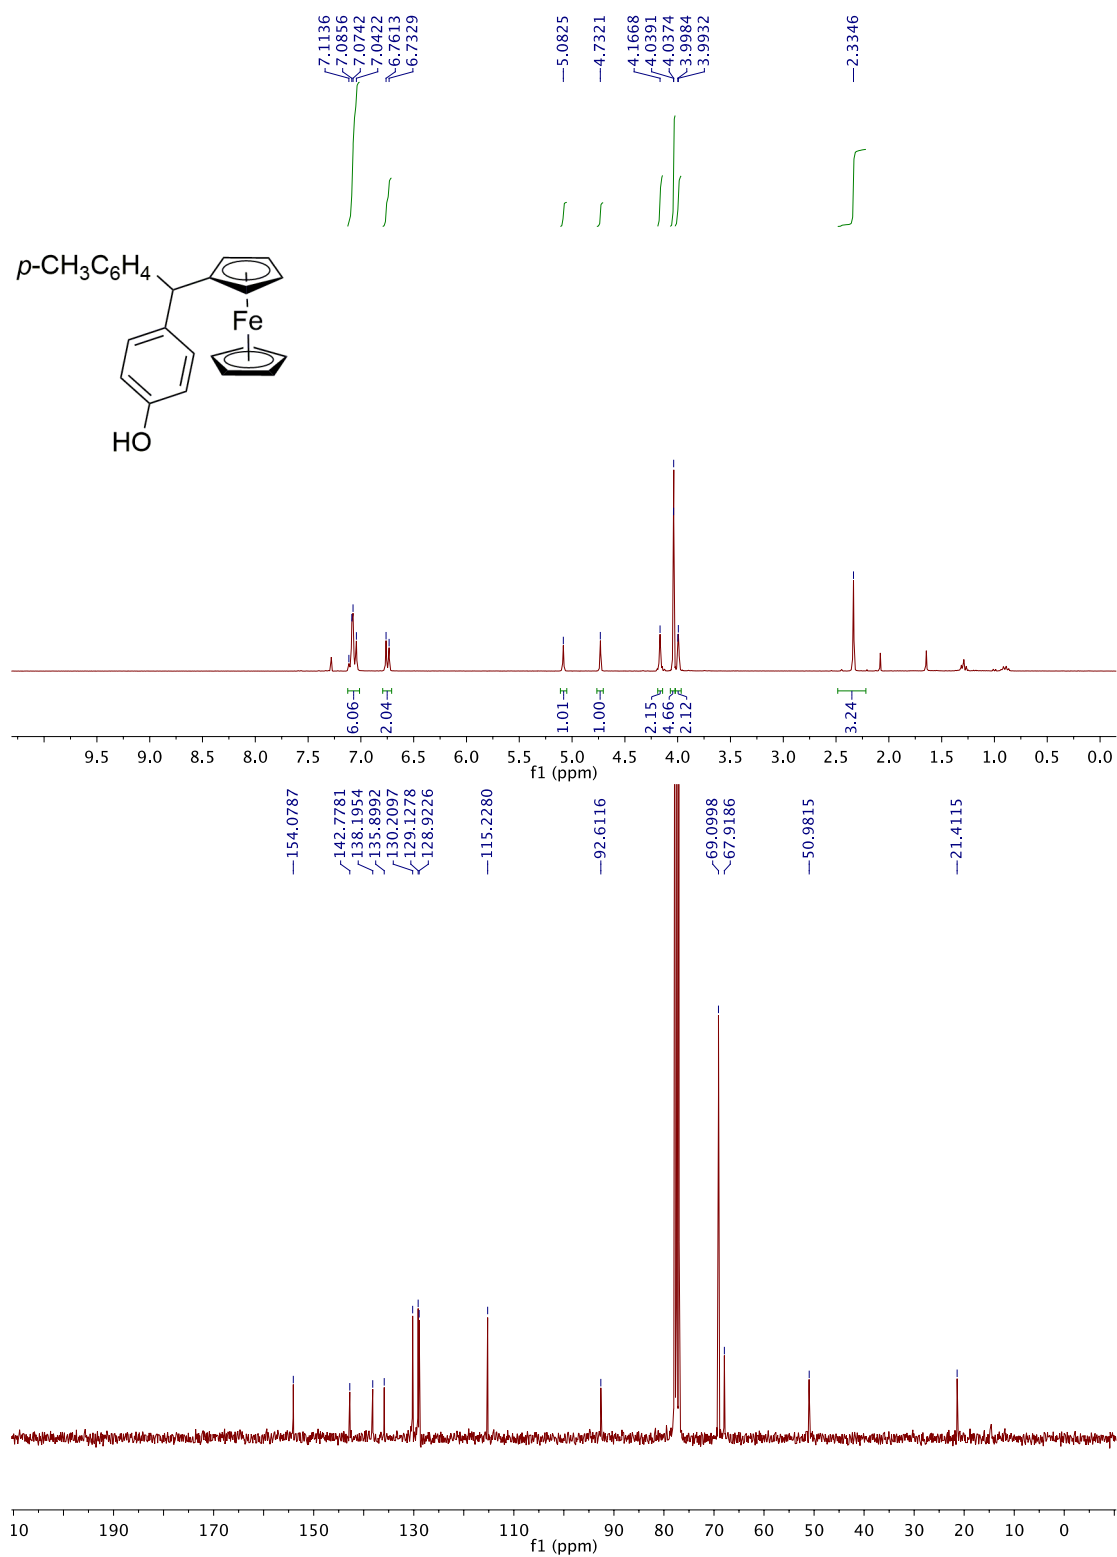

**Figure S4.** <sup>1</sup>H-NMR (300 MHz, CDCl<sub>3</sub>) and <sup>13</sup>C-NMR (75 MHz, CDCl<sub>3</sub>) spectra of ferrocene derivative **3d**.

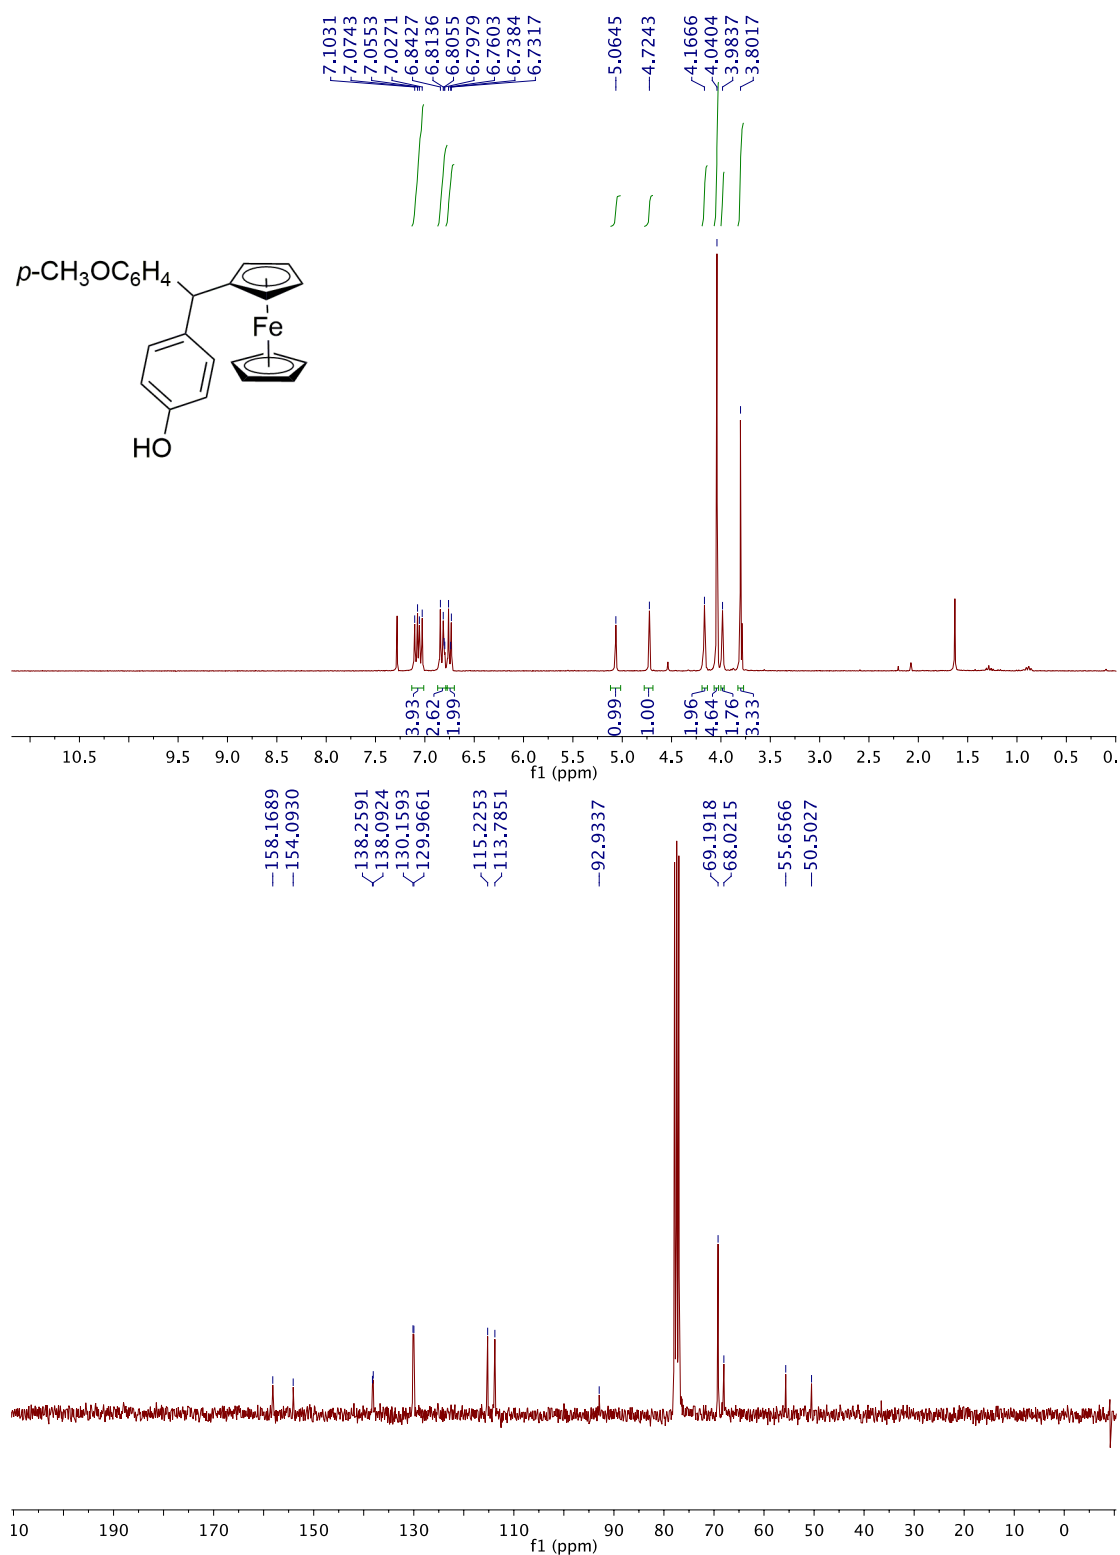

**Figure S5.** <sup>1</sup>H-NMR (300 MHz, CDCl<sub>3</sub>) and <sup>13</sup>C-NMR (75 MHz, CDCl<sub>3</sub>) spectra of ferrocene derivative **3e**.

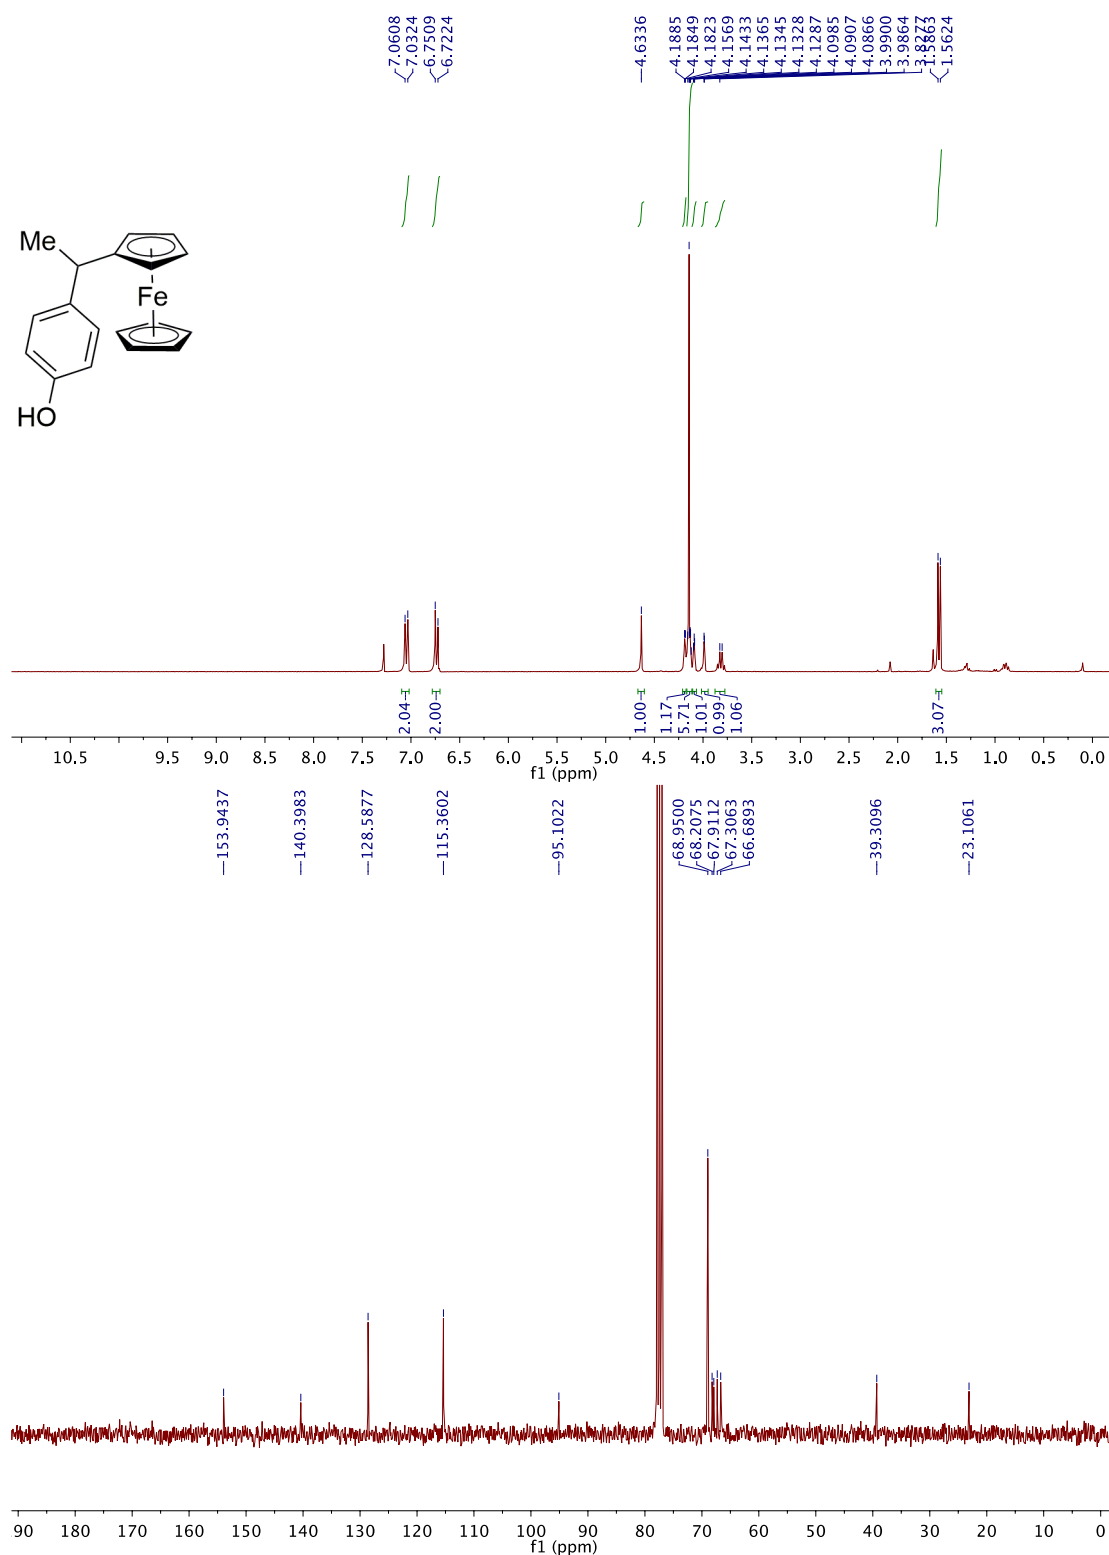

**Figure S6.** <sup>1</sup>H-NMR (300 MHz, CDCl<sub>3</sub>) and <sup>13</sup>C-NMR (75 MHz, CDCl<sub>3</sub>) spectra of ferrocene derivative **3f**.

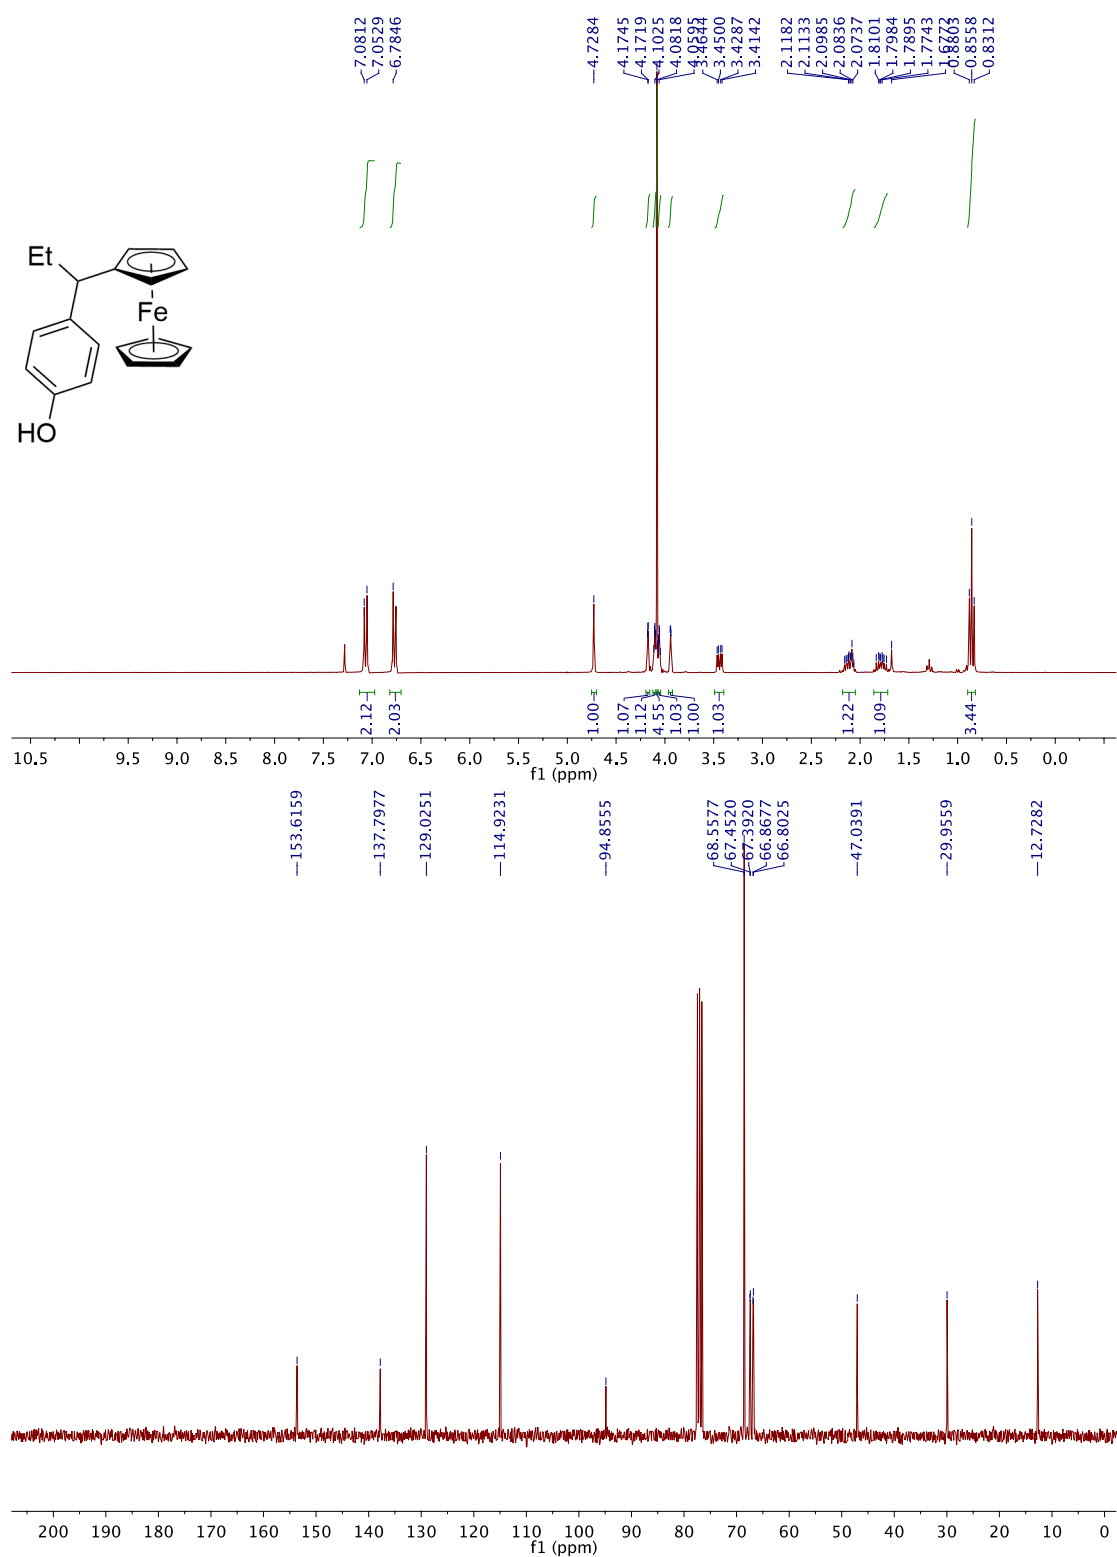

**Figure S7.** <sup>1</sup>H-NMR (300 MHz, CDCl<sub>3</sub>) and <sup>13</sup>C-NMR (75 MHz, CDCl<sub>3</sub>) spectra of ferrocene derivative **3g**.

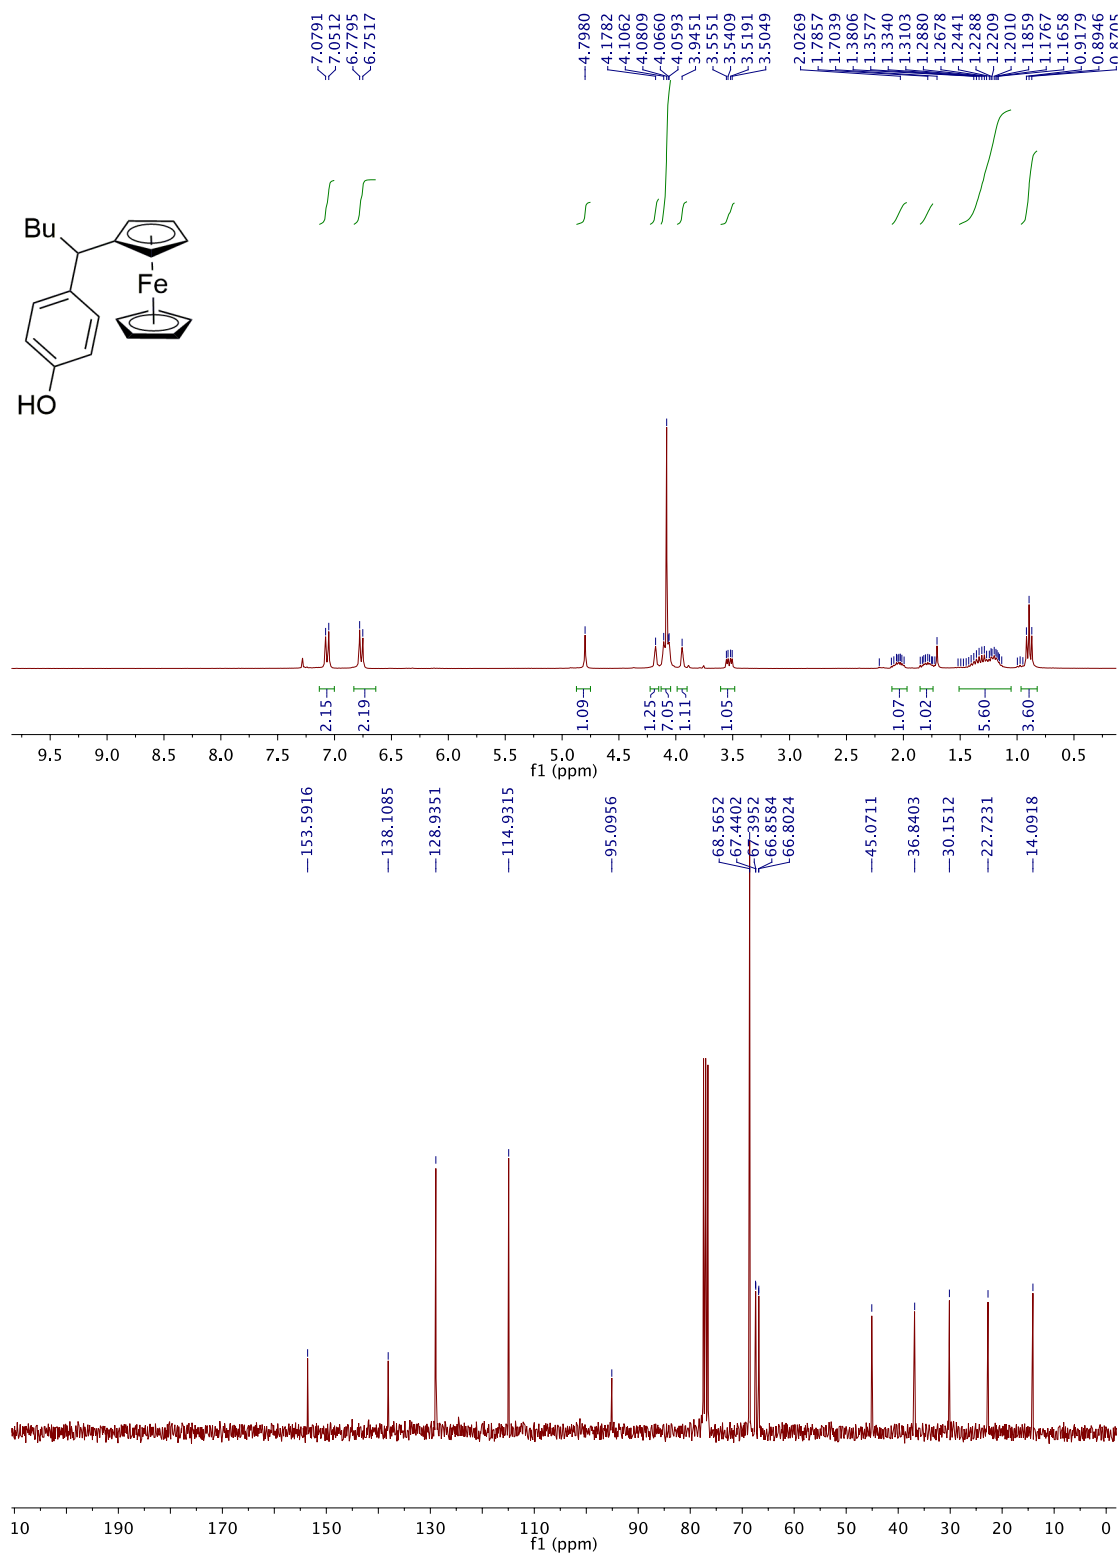

**Figure S8.** <sup>1</sup>H-NMR (300 MHz, CDCl<sub>3</sub>) and <sup>13</sup>C-NMR (75 MHz, CDCl<sub>3</sub>) spectra of ferrocene derivative **3h**.

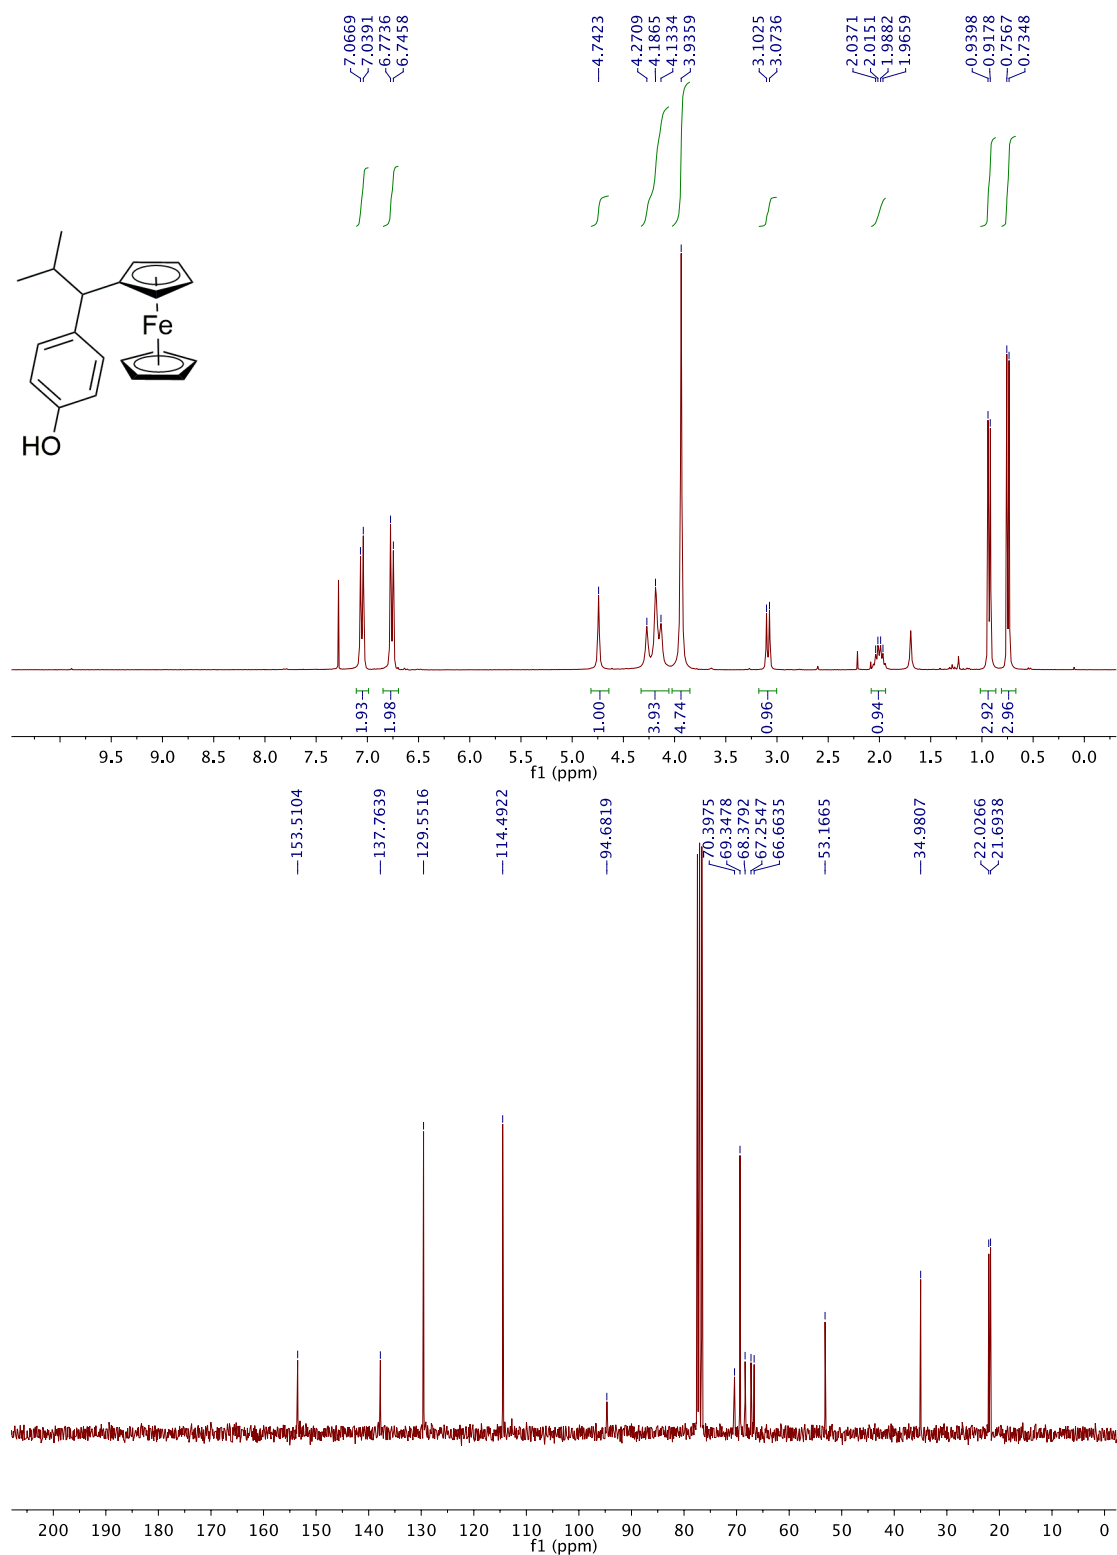

**Figure S9.** <sup>1</sup>H-NMR (300 MHz, CDCl<sub>3</sub>) and <sup>13</sup>C-NMR (75 MHz, CDCl<sub>3</sub>) spectra of ferrocene derivative **3i**.

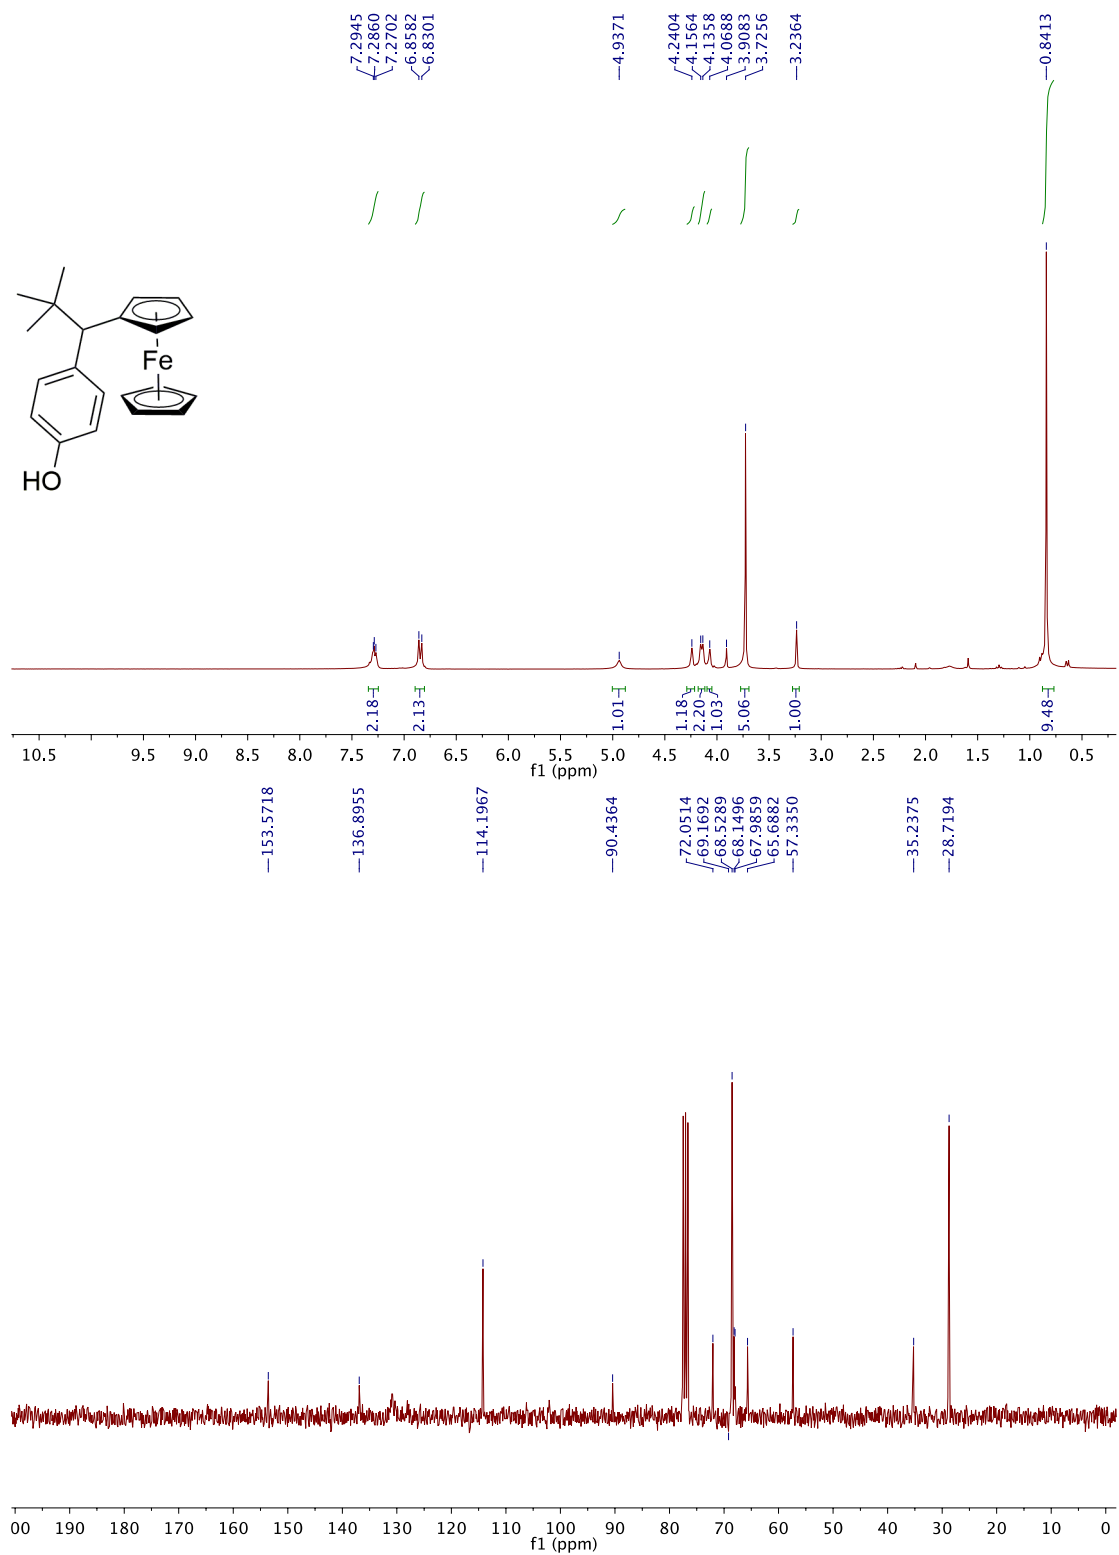

**Figure S10.** <sup>1</sup>H-NMR (300 MHz, CDCl<sub>3</sub>) and <sup>13</sup>C-NMR (75 MHz, CDCl<sub>3</sub>) spectra of ferrocene derivative **3j**.

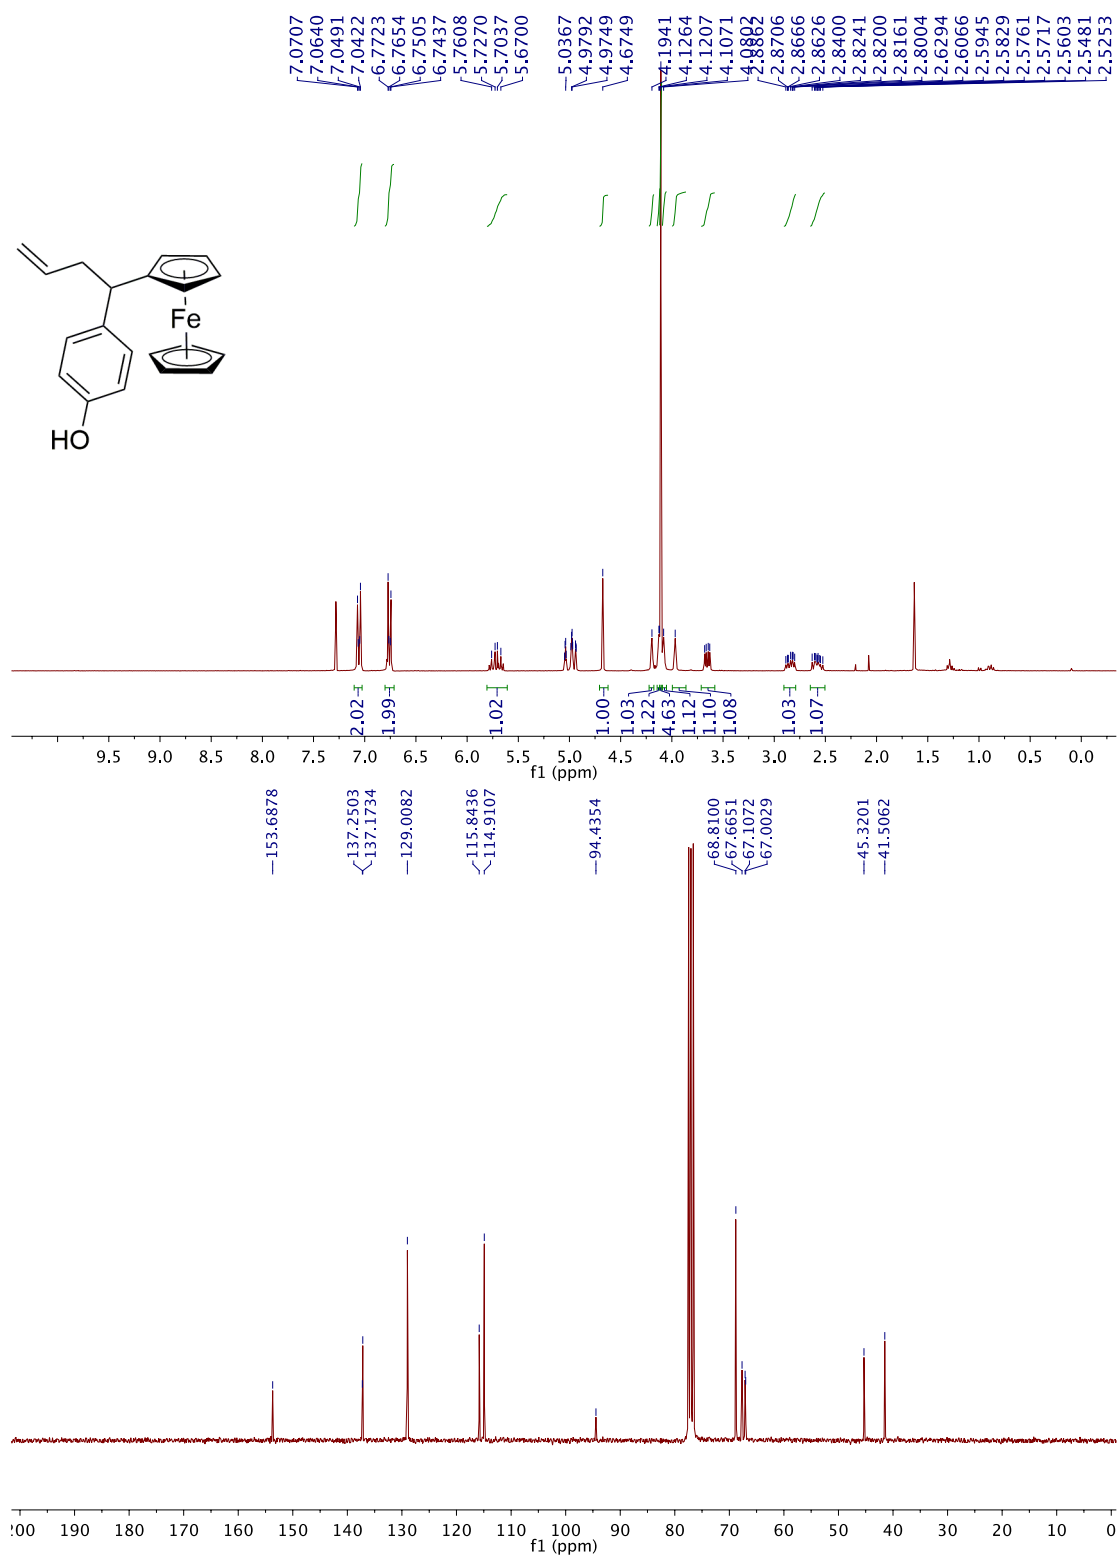

**Figure S11.** <sup>1</sup>H-NMR (300 MHz, CDCl<sub>3</sub>) and <sup>13</sup>C-NMR (75 MHz, CDCl<sub>3</sub>) spectra of ferrocene derivative **3k**.

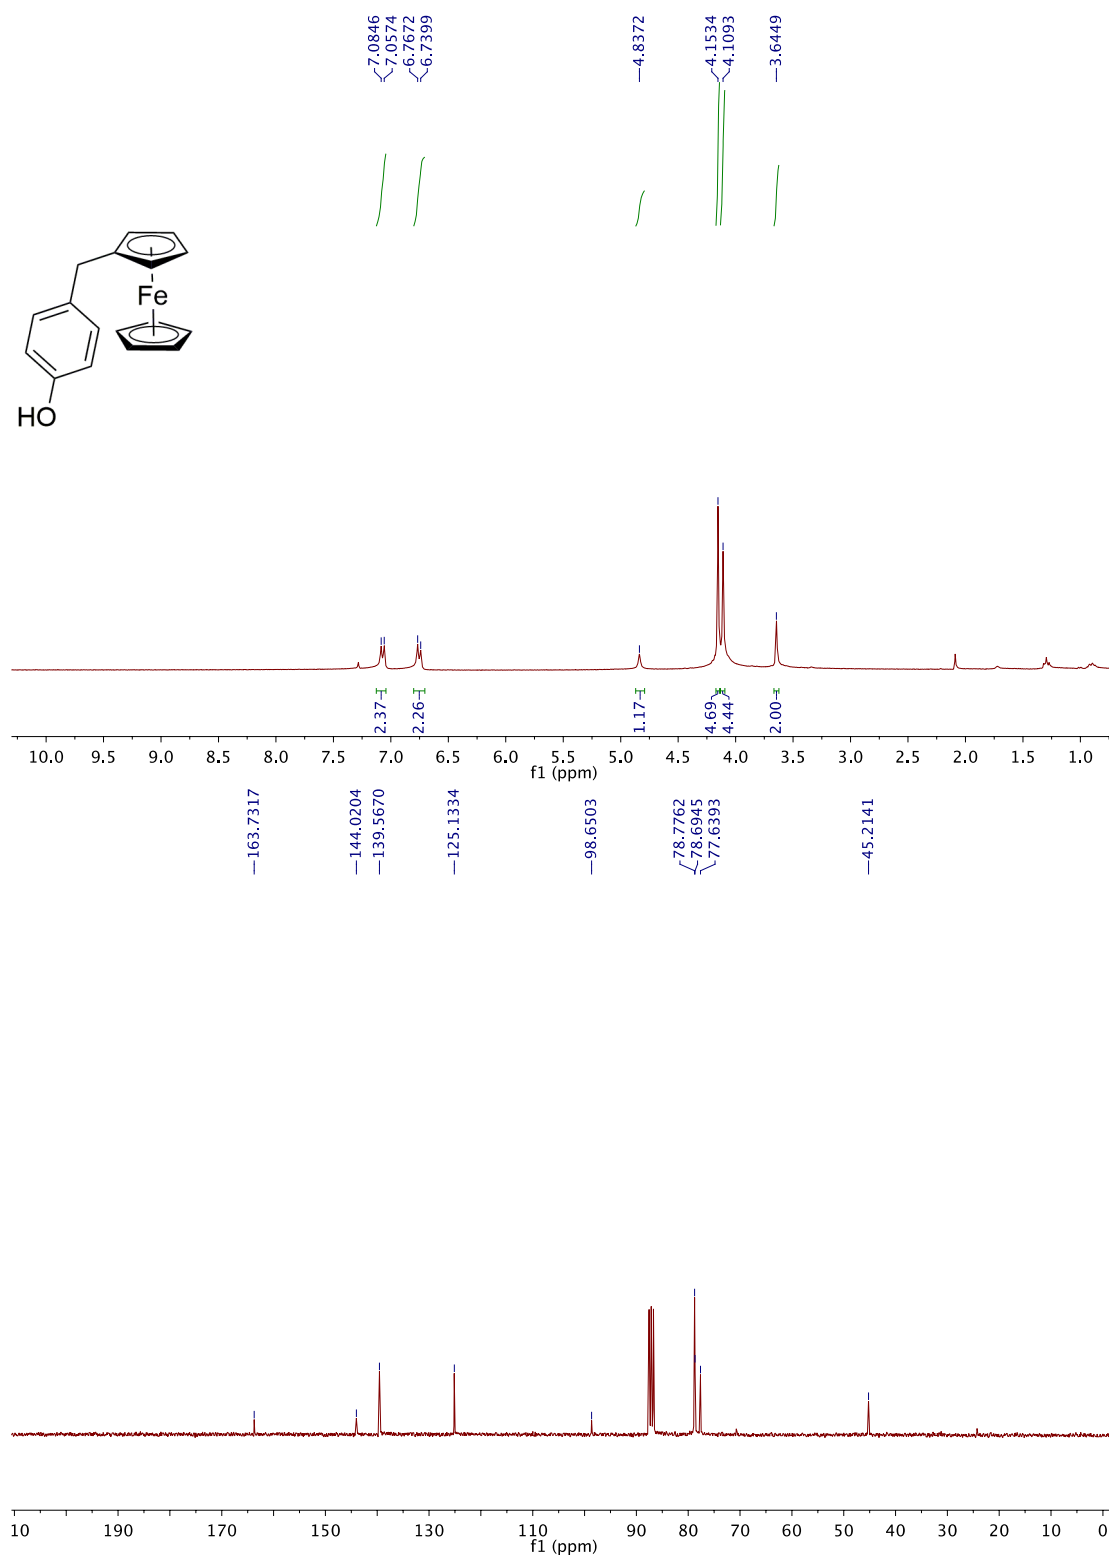

**Figure S12.** <sup>1</sup>H-NMR (300 MHz, CDCl<sub>3</sub>) and <sup>13</sup>C-NMR (75 MHz, CDCl<sub>3</sub>) spectra of ferrocene derivative **3l**.

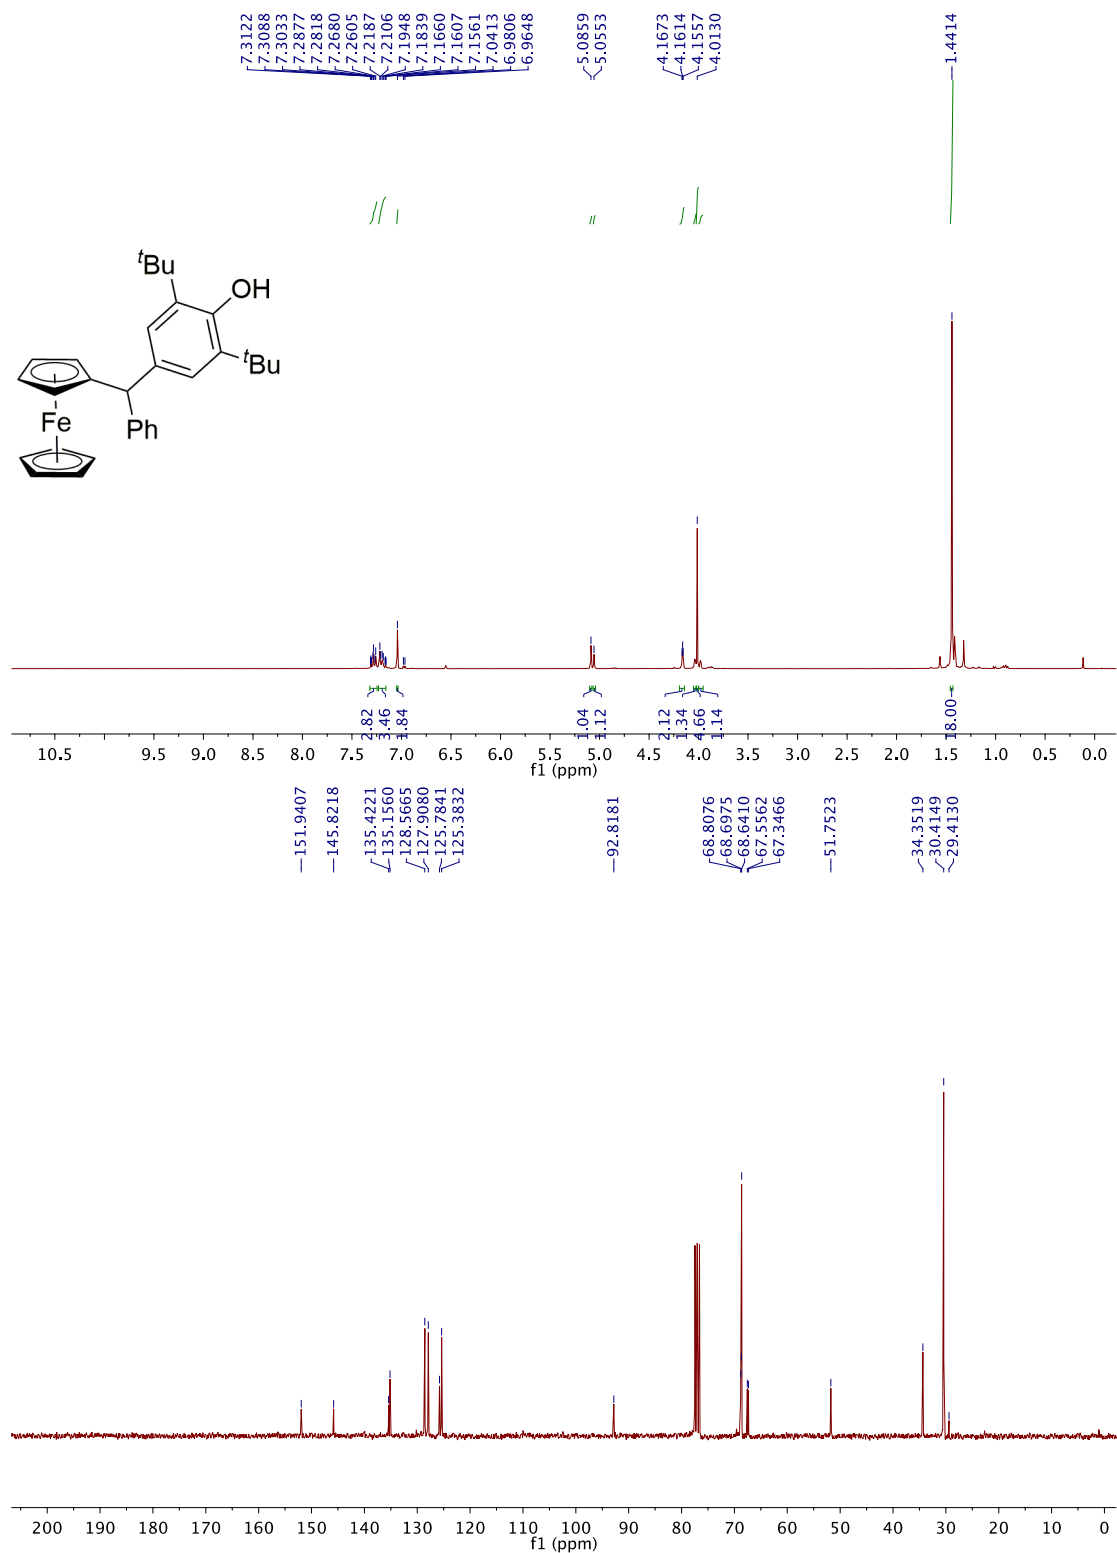

**Figure S13.** <sup>1</sup>H-NMR (300 MHz, CDCl<sub>3</sub>) and <sup>13</sup>C-NMR (75 MHz, CDCl<sub>3</sub>) spectra of ferrocene derivative **5**.
