# Supplementary material for: Trapping para-Quinone Methide Intermediates with Ferrocene: Synthesis and Preliminary Biological Evaluation of New Phenol-Ferrocene Conjugates
Source: MDPI journal article supplement (doi:10.3390/molecules23061335), 2018-06-01
Supplement: s1 [file s1]

# Trapping *para*-Quinone Methide Intermediates with Ferrocene: Synthesis and Preliminary Biological Evaluation of New Phenol-Ferrocene Conjugates

Silvia González-Pelayo,<sup>a</sup> Enol López H.,<sup>a</sup> Javier Borge,<sup>b</sup> Noemí de-los-Santos-Álvarez<sup>c</sup> and Luis A. López<sup>a\*</sup>

<sup>a</sup>Departamento de Química Orgánica e Inorgánica, Instituto Universitario de Química Organometálica "Enrique Moles", Universidad de Oviedo, Julián Clavería 8, 33006 Oviedo, Spain, <sup>b</sup>Departamento de Química Física y Analítica, Centro de Innovación en Química Avanzada (ORFEO-CINQA), Universidad de Oviedo, Julián Clavería 8, 33006 Oviedo, Spain, and <sup>c</sup>Departamento de Química Física y Analítica, Universidad de Oviedo, Julián Clavería 8, 33006 Oviedo, Spain

Correspondence email: lalg@uniovi.es

## Abstract

The reaction of *para*-hydroxybenzyl alcohols with ferrocene in the presence of a catalytic amount of InCl<sub>3</sub> provided ferrocenyl phenol derivatives, an interesting class of organometallic compounds with potential applications in medicinal chemistry. This transformation exhibited a reasonable substrate scope delivering the desired products in synthetically useful yields. Evidence of involvement of a *para*-quinone methide intermediate in this coupling process was also provided. Preliminary biological evaluation demonstrated that some of the ferrocene derivatives available by this methodology exhibit significant cytotoxicity against several cancer cell lines with IC<sub>50</sub> values withing the range of 1.07–4.89  $\mu$ M.

## 1. Synthesis and crystallization

Crystals of compound '3a', suitable for X-ray diffraction analysis, were obtained from diffusion of pentane into dichloromethane solutions at –20 °C. Data collection was performed with a Rigaku-Oxford Diffraction Xcalibur Onyx Nova single-crystal diffractometer using Cu–K $\alpha$  radiation ( $\lambda$  = 1.5418 Å). Images were collected at a fixed crystal-detector distance of 62 mm, using the oscillation method with 1.30° oscillation and 20.0–215.0 s variable exposure time per image. Data collection strategy was calculated with the program *CrysAlis<sup>Pro</sup>*<sup>[1]</sup>. Data reduction and cell refinement were also performed with the program *CrysAlis<sup>Pro</sup>*<sup>[1]</sup>. An empirical absorption correction was applied using the SCALE3 ABSPACK algorithm as implemented in the program *CrysAlis<sup>Pro</sup>*<sup>[1]</sup>. The most relevant crystal and refinement data are collected in Table 1.

## 2. Refinement

The structure was solved by Patterson interpretation and phase expansion using *DIRDIF2008*<sup>[2]</sup>. Isotropic least-squares refinements on  $F^2$  using *SHELXL2014*<sup>[3]</sup> were performed. During the final stages of the refinements, all the positional and anisotropic displacement parameters of all non-H atoms were refined. The H atoms were geometrically located and their coordinates were refined riding on their parent atoms. The crystallographic plots were made with *PLATON*<sup>[4]</sup> and *Mercury CSD 3.8*<sup>[5]</sup>.

**Table 1**

Experimental details

|                             |                                     |
|-----------------------------|-------------------------------------|
| Crystal data                |                                     |
| Chemical formula            | C <sub>23</sub> H <sub>20</sub> FeO |
| $M_r$                       | 368.24                              |
| Crystal system, space group | Monoclinic, $P2_1/n$                |
| Temperature (K)             | 299                                 |

|                                                                                     |                                                                                                                                                                                              |
|-------------------------------------------------------------------------------------|----------------------------------------------------------------------------------------------------------------------------------------------------------------------------------------------|
| $a, b, c$ (Å)                                                                       | 15.6620 (12), 6.0219 (3), 18.7859 (11)                                                                                                                                                       |
| $\beta$ (°)                                                                         | 96.990 (6)                                                                                                                                                                                   |
| $V$ (Å <sup>3</sup> )                                                               | 1758.6 (2)                                                                                                                                                                                   |
| $Z$                                                                                 | 4                                                                                                                                                                                            |
| Radiation type                                                                      | Cu $K\alpha$                                                                                                                                                                                 |
| $\mu$ (mm <sup>-1</sup> )                                                           | 6.91                                                                                                                                                                                         |
| Crystal size (mm)                                                                   | 0.30 × 0.09 × 0.02                                                                                                                                                                           |
| Data collection                                                                     |                                                                                                                                                                                              |
| Diffractometer                                                                      | Xcalibur, Onyx, Nova                                                                                                                                                                         |
| Absorption correction                                                               | Multi-scan<br><i>CrysAlis PRO</i> 1.171.38.43 (Rigaku Oxford Diffraction, 2015). Empirical absorption correction using spherical harmonics, implemented in SCALE3 ABSPACK scaling algorithm. |
| $T_{\min}, T_{\max}$                                                                | 0.675, 1.000                                                                                                                                                                                 |
| No. of measured,<br>independent and<br>observed [ $I > 2\sigma(I)$ ]<br>reflections | 8336, 3254, 2641                                                                                                                                                                             |
| $R_{\text{int}}$                                                                    | 0.045                                                                                                                                                                                        |
| $(\sin \theta/\lambda)_{\text{max}}$ (Å <sup>-1</sup> )                             | 0.608                                                                                                                                                                                        |
| Refinement                                                                          |                                                                                                                                                                                              |
| $R[F^2 > 2\sigma(F^2)]$ , $wR(F^2)$ , $S$                                           | 0.079, 0.255, 1.12                                                                                                                                                                           |
| No. of reflections                                                                  | 3254                                                                                                                                                                                         |
| No. of parameters                                                                   | 238                                                                                                                                                                                          |
| H-atom treatment                                                                    | H-atom parameters constrained                                                                                                                                                                |
| $\Delta\rho_{\text{max}}, \Delta\rho_{\text{min}}$ (e Å <sup>-3</sup> )             | 0.95, -0.72                                                                                                                                                                                  |

Computer programs: *CrysAlis<sup>Pro</sup>* (Rigaku Oxford Diffraction, 2015), *DIRDIF2008* (Beurskens *et al.*, 2008), *SHELXL2014* (Sheldrick, 2015), *PLATON* (Spek, 2009) / *Mercury* CSD 3.8 (Macrae *et al.*, 2008).

## Acknowledgements

## Funding information

## References

- [1] Rigaku Oxford Diffraction. **2015**. *CrysAlis<sup>Pro</sup>*.
- [2] Beurskens, P. T.; Beurskens, G.; de Gelder, R.; García-Granda, S.; Gould, R. O.; Smits, J. M. M. **2008**. *The DIRDIF2008 program system*. Crystallography Laboratory, University of Nijmegen: Nijmegen, The Netherlands.
- [3] Sheldrick, G. M. *Acta Cryst.* **2015**, C71, 3-8.
- [4] Spek, A. L. *Acta Cryst.* **2009**, D65, 148-155.
- [5] Macrae, C. F.; Bruno, I. J.; Chisholm, J. A.; Edgington, P. R.; McCabe, P.; Pidcock, E.; Rodríguez-Monge, L.; Taylor, R.; van de Streek, J.; Wood, P. A. *J. Appl. Cryst.* **2008**, 41, 466-470.

## Figure 1

## supporting information

## Trapping *para*-Quinone Methide Intermediates with Ferrocene: Synthesis and Preliminary Biological Evaluation of New Phenol-Ferrocene Conjugates

### Computing details

Data collection: *CrysAlis<sup>Pro</sup>* (Rigaku Oxford Diffraction, 2015); cell refinement: *CrysAlis<sup>Pro</sup>* (Rigaku Oxford Diffraction, 2015); data reduction: *CrysAlis<sup>Pro</sup>* (Rigaku Oxford Diffraction, 2015); program(s) used to solve structure: *DIRDIF2008* (Beurskens *et al.*, 2008); program(s) used to refine structure: *SHELXL2014* (Sheldrick, 2015); molecular graphics: *PLATON* (Spek, 2009) / *Mercury* CSD 3.8 (Macrae *et al.*, 2008).

### (3a)

#### Crystal data

$C_{23}H_{20}FeO$

$M_r = 368.24$

Monoclinic,  $P2_1/n$

$a = 15.6620$  (12) Å

$b = 6.0219$  (3) Å

$c = 18.7859$  (11) Å

$\beta = 96.990$  (6)°

$V = 1758.6$  (2) Å<sup>3</sup>

$Z = 4$

$F(000) = 768$

$D_x = 1.391$  Mg m<sup>-3</sup>

Cu  $K\alpha$  radiation,  $\lambda = 1.54184$  Å

Cell parameters from 2708 reflections

$\theta = 3.5$ – $68.3^\circ$

$\mu = 6.91$  mm<sup>-1</sup>

$T = 299$  K

Prism, orange

$0.30 \times 0.09 \times 0.02$  mm

#### Data collection

Xcalibur, Onyx, Nova  
diffractometer

Radiation source: micro-focus sealed X-ray tube, Nova  
(Cu) X-ray Source

Detector resolution: 8.2640 pixels mm<sup>-1</sup>

Absorption correction: multi-scan

*CrysAlis PRO* 1.171.38.43 (Rigaku Oxford  
Diffraction, 2015). Empirical absorption correction  
using spherical harmonics, implemented in SCALE3  
ABSPACK scaling algorithm.

$T_{\min} = 0.675$ ,  $T_{\max} = 1.000$

8336 measured reflections

3254 independent reflections

2641 reflections with  $I > 2\sigma(I)$

$R_{\text{int}} = 0.045$

$\theta_{\max} = 69.6^\circ$ ,  $\theta_{\min} = 3.5^\circ$

$h = -18 \rightarrow 18$

$k = -4 \rightarrow 7$

$l = -21 \rightarrow 22$

#### Refinement

Refinement on  $F^2$

Least-squares matrix: full

$R[F^2 > 2\sigma(F^2)] = 0.079$

$wR(F^2) = 0.255$

$S = 1.12$

3254 reflections

238 parameters

0 restraints

Hydrogen site location: inferred from neighbouring  
sites

H-atom parameters constrained

$w = 1/[\sigma^2(F_o^2) + (0.1187P)^2 + 4.0893P]$

where  $P = (F_o^2 + 2F_c^2)/3$

$(\Delta/\sigma)_{\max} < 0.001$

$\Delta\rho_{\max} = 0.95$  e Å<sup>-3</sup>

$\Delta\rho_{\min} = -0.72$  e Å<sup>-3</sup>

*Special details*

*Geometry.* All e.s.d.'s (except the e.s.d. in the dihedral angle between two l.s. planes) are estimated using the full covariance matrix. The cell e.s.d.'s are taken into account individually in the estimation of e.s.d.'s in distances, angles and torsion angles; correlations between e.s.d.'s in cell parameters are only used when they are defined by crystal symmetry. An approximate (isotropic) treatment of cell e.s.d.'s is used for estimating e.s.d.'s involving l.s. planes.

*Fractional atomic coordinates and isotropic or equivalent isotropic displacement parameters ( $\text{\AA}^2$ )*

|     | <i>x</i>    | <i>y</i>     | <i>z</i>    | $U_{\text{iso}}^*/U_{\text{eq}}$ | Occ. (<1)  |
|-----|-------------|--------------|-------------|----------------------------------|------------|
| Fe1 | 0.08144 (6) | 0.17743 (15) | 0.35123 (5) | 0.0530 (4)                       |            |
| C8  | 0.2121 (4)  | 0.2094 (10)  | 0.3784 (3)  | 0.0529 (13)                      |            |
| C9  | 0.1844 (5)  | −0.0096 (11) | 0.3924 (4)  | 0.0677 (17)                      |            |
| H9  | 0.1904      | −0.0808      | 0.4367      | 0.081*                           |            |
| C10 | 0.1456 (5)  | −0.0998 (13) | 0.3259 (5)  | 0.078 (2)                        |            |
| H10 | 0.1227      | −0.2420      | 0.3195      | 0.094*                           |            |
| C11 | 0.1473 (4)  | 0.0589 (14)  | 0.2722 (4)  | 0.072 (2)                        |            |
| H11 | 0.1254      | 0.0416       | 0.2243      | 0.087*                           |            |
| C12 | 0.1884 (4)  | 0.2515 (13)  | 0.3034 (3)  | 0.0612 (15)                      |            |
| H12 | 0.1982      | 0.3824       | 0.2794      | 0.073*                           |            |
| C13 | 0.0022 (6)  | 0.2293 (15)  | 0.4283 (4)  | 0.081 (2)                        |            |
| H13 | 0.0153      | 0.1961       | 0.4767      | 0.097*                           |            |
| C14 | −0.0375 (6) | 0.0865 (15)  | 0.3758 (6)  | 0.094 (3)                        |            |
| H14 | −0.0564     | −0.0570      | 0.3833      | 0.113*                           |            |
| C15 | −0.0438 (5) | 0.2001 (16)  | 0.3082 (5)  | 0.087 (3)                        |            |
| H15 | −0.0665     | 0.1439       | 0.2638      | 0.104*                           |            |
| C16 | −0.0090 (5) | 0.4139 (14)  | 0.3224 (4)  | 0.0723 (18)                      |            |
| H16 | −0.0051     | 0.5250       | 0.2885      | 0.087*                           |            |
| C17 | 0.0187 (5)  | 0.4311 (13)  | 0.3956 (4)  | 0.0716 (18)                      |            |
| H17 | 0.0439      | 0.5555       | 0.4188      | 0.086*                           |            |
| C7  | 0.2640 (4)  | 0.3660 (9)   | 0.4282 (3)  | 0.0496 (12)                      |            |
| H7  | 0.2404      | 0.5147       | 0.4175      | 0.059*                           |            |
| C1  | 0.2573 (4)  | 0.3236 (10)  | 0.5076 (3)  | 0.0548 (14)                      |            |
| C2  | 0.2125 (4)  | 0.4666 (13)  | 0.5465 (3)  | 0.0653 (16)                      |            |
| H2  | 0.1861      | 0.5902       | 0.5237      | 0.078*                           |            |
| C3  | 0.2054 (5)  | 0.4325 (17)  | 0.6181 (4)  | 0.083 (2)                        |            |
| H3  | 0.1756      | 0.5332       | 0.6433      | 0.099*                           |            |
| C4  | 0.2428 (5)  | 0.2488 (18)  | 0.6514 (4)  | 0.082 (2)                        |            |
| H4  | 0.2374      | 0.2234       | 0.6995      | 0.098*                           | 0.205 (15) |
| O4  | 0.2336 (5)  | 0.226 (2)    | 0.7224 (3)  | 0.114 (4)                        | 0.795 (15) |
| H4O | 0.1843      | 0.1871       | 0.7266      | 0.171*                           | 0.795 (15) |
| C5  | 0.2881 (5)  | 0.1016 (14)  | 0.6147 (4)  | 0.0735 (19)                      |            |
| H5  | 0.3133      | −0.0233      | 0.6376      | 0.088*                           |            |
| C6  | 0.2957 (4)  | 0.1411 (12)  | 0.5434 (3)  | 0.0625 (16)                      |            |
| H6  | 0.3274      | 0.0431       | 0.5187      | 0.075*                           |            |
| C18 | 0.3575 (4)  | 0.3722 (10)  | 0.4130 (3)  | 0.0525 (13)                      |            |
| C19 | 0.4045 (5)  | 0.5675 (12)  | 0.4272 (3)  | 0.0674 (17)                      |            |
| H19 | 0.3786      | 0.6891       | 0.4464      | 0.081*                           |            |
| C20 | 0.4883 (5)  | 0.5823 (16)  | 0.4132 (4)  | 0.081 (2)                        |            |
| H20 | 0.5188      | 0.7138       | 0.4226      | 0.097*                           |            |
| C21 | 0.5269 (5)  | 0.4042 (17)  | 0.3855 (4)  | 0.084 (2)                        |            |
| H21 | 0.5838      | 0.4142       | 0.3761      | 0.101*                           | 0.795 (15) |
| O21 | 0.6030 (15) | 0.387 (6)    | 0.3677 (19) | 0.097 (11)                       | 0.205 (15) |

|      |            |             |            |             |            |
|------|------------|-------------|------------|-------------|------------|
| H21O | 0.6269     | 0.5087      | 0.3717     | 0.146*      | 0.205 (15) |
| C22  | 0.4819 (5) | 0.2097 (15) | 0.3715 (4) | 0.081 (2)   |            |
| H22  | 0.5085     | 0.0883      | 0.3530     | 0.097*      |            |
| C23  | 0.3968 (5) | 0.1942 (11) | 0.3849 (4) | 0.0665 (17) |            |
| H23  | 0.3664     | 0.0629      | 0.3749     | 0.080*      |            |

*Atomic displacement parameters ( $\text{\AA}^2$ )*

|     | $U^{11}$   | $U^{22}$   | $U^{33}$   | $U^{12}$    | $U^{13}$   | $U^{23}$    |
|-----|------------|------------|------------|-------------|------------|-------------|
| Fe1 | 0.0569 (6) | 0.0544 (6) | 0.0479 (5) | 0.0002 (4)  | 0.0079 (4) | −0.0052 (4) |
| C8  | 0.057 (3)  | 0.052 (3)  | 0.049 (3)  | 0.003 (3)   | 0.007 (2)  | −0.003 (2)  |
| C9  | 0.072 (4)  | 0.050 (3)  | 0.078 (4)  | 0.000 (3)   | −0.001 (3) | −0.006 (3)  |
| C10 | 0.070 (4)  | 0.063 (4)  | 0.100 (6)  | 0.002 (3)   | 0.006 (4)  | −0.035 (4)  |
| C11 | 0.062 (4)  | 0.100 (6)  | 0.055 (3)  | 0.000 (4)   | 0.008 (3)  | −0.029 (4)  |
| C12 | 0.060 (3)  | 0.078 (4)  | 0.046 (3)  | 0.002 (3)   | 0.007 (3)  | −0.009 (3)  |
| C13 | 0.088 (5)  | 0.096 (6)  | 0.066 (4)  | 0.015 (5)   | 0.033 (4)  | 0.012 (4)   |
| C14 | 0.086 (5)  | 0.067 (5)  | 0.137 (8)  | −0.006 (4)  | 0.044 (6)  | 0.003 (5)   |
| C15 | 0.058 (4)  | 0.109 (7)  | 0.091 (6)  | 0.002 (4)   | −0.001 (4) | −0.031 (5)  |
| C16 | 0.071 (4)  | 0.078 (5)  | 0.068 (4)  | 0.012 (4)   | 0.012 (3)  | 0.012 (4)   |
| C17 | 0.073 (4)  | 0.073 (4)  | 0.069 (4)  | 0.007 (4)   | 0.013 (3)  | −0.012 (4)  |
| C7  | 0.061 (3)  | 0.043 (3)  | 0.043 (3)  | 0.002 (2)   | 0.001 (2)  | −0.001 (2)  |
| C1  | 0.058 (3)  | 0.057 (3)  | 0.048 (3)  | 0.000 (3)   | 0.002 (3)  | −0.001 (3)  |
| C2  | 0.064 (4)  | 0.079 (4)  | 0.052 (3)  | 0.012 (3)   | 0.004 (3)  | −0.011 (3)  |
| C3  | 0.070 (4)  | 0.122 (7)  | 0.057 (4)  | 0.017 (5)   | 0.011 (3)  | −0.016 (4)  |
| C4  | 0.068 (4)  | 0.136 (7)  | 0.043 (3)  | −0.004 (5)  | 0.011 (3)  | 0.001 (4)   |
| O4  | 0.087 (5)  | 0.216 (11) | 0.041 (3)  | 0.005 (6)   | 0.017 (3)  | 0.016 (5)   |
| C5  | 0.071 (4)  | 0.093 (5)  | 0.056 (4)  | 0.005 (4)   | 0.003 (3)  | 0.019 (4)   |
| C6  | 0.069 (4)  | 0.069 (4)  | 0.049 (3)  | 0.008 (3)   | 0.007 (3)  | 0.003 (3)   |
| C18 | 0.063 (3)  | 0.053 (3)  | 0.040 (3)  | 0.001 (3)   | 0.000 (2)  | 0.004 (2)   |
| C19 | 0.078 (4)  | 0.066 (4)  | 0.055 (3)  | −0.012 (3)  | −0.002 (3) | 0.003 (3)   |
| C20 | 0.076 (5)  | 0.089 (5)  | 0.075 (5)  | −0.017 (4)  | −0.004 (4) | 0.012 (4)   |
| C21 | 0.072 (5)  | 0.112 (7)  | 0.068 (4)  | 0.000 (5)   | 0.003 (4)  | 0.026 (5)   |
| O21 | 0.042 (13) | 0.14 (3)   | 0.12 (2)   | −0.019 (14) | 0.018 (13) | 0.00 (2)    |
| C22 | 0.079 (5)  | 0.095 (6)  | 0.070 (4)  | 0.019 (4)   | 0.013 (4)  | 0.013 (4)   |
| C23 | 0.073 (4)  | 0.062 (4)  | 0.064 (4)  | 0.004 (3)   | 0.004 (3)  | 0.006 (3)   |

*Geometric parameters ( $\text{\AA}$ ,  $^\circ$ )*

|         |            |        |            |
|---------|------------|--------|------------|
| Fe1—C15 | 2.033 (8)  | C7—C18 | 1.527 (8)  |
| Fe1—C10 | 2.034 (7)  | C7—C1  | 1.529 (8)  |
| Fe1—C16 | 2.035 (7)  | C7—H7  | 0.9800     |
| Fe1—C11 | 2.037 (7)  | C1—C2  | 1.375 (9)  |
| Fe1—C9  | 2.040 (7)  | C1—C6  | 1.387 (9)  |
| Fe1—C13 | 2.042 (7)  | C2—C3  | 1.378 (10) |
| Fe1—C12 | 2.044 (7)  | C2—H2  | 0.9300     |
| Fe1—C14 | 2.047 (8)  | C3—C4  | 1.367 (13) |
| Fe1—C17 | 2.048 (7)  | C3—H3  | 0.9300     |
| Fe1—C8  | 2.058 (6)  | C4—O4  | 1.366 (9)  |
| C8—C9   | 1.423 (9)  | C4—C5  | 1.373 (12) |
| C8—C12  | 1.435 (8)  | C4—H4  | 0.9300     |
| C8—C7   | 1.497 (8)  | O4—H4O | 0.8200     |
| C9—C10  | 1.429 (10) | C5—C6  | 1.380 (9)  |

|             |            |             |            |
|-------------|------------|-------------|------------|
| C9—H9       | 0.9300     | C5—H5       | 0.9300     |
| C10—C11     | 1.392 (12) | C6—H6       | 0.9300     |
| C10—H10     | 0.9300     | C18—C23     | 1.372 (9)  |
| C11—C12     | 1.418 (10) | C18—C19     | 1.396 (9)  |
| C11—H11     | 0.9300     | C19—C20     | 1.374 (11) |
| C12—H12     | 0.9300     | C19—H19     | 0.9300     |
| C13—C14     | 1.396 (13) | C20—C21     | 1.365 (13) |
| C13—C17     | 1.400 (11) | C20—H20     | 0.9300     |
| C13—H13     | 0.9300     | C21—O21     | 1.28 (2)   |
| C14—C15     | 1.435 (14) | C21—C22     | 1.376 (13) |
| C14—H14     | 0.9300     | C21—H21     | 0.9300     |
| C15—C16     | 1.411 (12) | O21—H21O    | 0.8200     |
| C15—H15     | 0.9300     | C22—C23     | 1.389 (11) |
| C16—C17     | 1.396 (10) | C22—H22     | 0.9300     |
| C16—H16     | 0.9300     | C23—H23     | 0.9300     |
| C17—H17     | 0.9300     |             |            |
| C15—Fe1—C10 | 116.2 (3)  | C17—C13—Fe1 | 70.2 (4)   |
| C15—Fe1—C16 | 40.6 (4)   | C14—C13—H13 | 125.8      |
| C10—Fe1—C16 | 149.3 (3)  | C17—C13—H13 | 125.8      |
| C15—Fe1—C11 | 106.5 (3)  | Fe1—C13—H13 | 125.4      |
| C10—Fe1—C11 | 40.0 (3)   | C13—C14—C15 | 107.9 (7)  |
| C16—Fe1—C11 | 116.7 (3)  | C13—C14—Fe1 | 69.9 (5)   |
| C15—Fe1—C9  | 150.2 (3)  | C15—C14—Fe1 | 68.9 (5)   |
| C10—Fe1—C9  | 41.1 (3)   | C13—C14—H14 | 126.0      |
| C16—Fe1—C9  | 168.4 (3)  | C15—C14—H14 | 126.0      |
| C11—Fe1—C9  | 68.7 (3)   | Fe1—C14—H14 | 126.8      |
| C15—Fe1—C13 | 68.3 (4)   | C16—C15—C14 | 106.6 (7)  |
| C10—Fe1—C13 | 130.6 (4)  | C16—C15—Fe1 | 69.8 (4)   |
| C16—Fe1—C13 | 67.6 (3)   | C14—C15—Fe1 | 69.9 (5)   |
| C11—Fe1—C13 | 167.3 (4)  | C16—C15—H15 | 126.7      |
| C9—Fe1—C13  | 109.6 (3)  | C14—C15—H15 | 126.7      |
| C15—Fe1—C12 | 127.8 (3)  | Fe1—C15—H15 | 125.2      |
| C10—Fe1—C12 | 67.8 (3)   | C17—C16—C15 | 108.7 (7)  |
| C16—Fe1—C12 | 108.1 (3)  | C17—C16—Fe1 | 70.5 (4)   |
| C11—Fe1—C12 | 40.7 (3)   | C15—C16—Fe1 | 69.6 (5)   |
| C9—Fe1—C12  | 68.6 (3)   | C17—C16—H16 | 125.7      |
| C13—Fe1—C12 | 151.6 (3)  | C15—C16—H16 | 125.7      |
| C15—Fe1—C14 | 41.2 (4)   | Fe1—C16—H16 | 125.8      |
| C10—Fe1—C14 | 108.8 (3)  | C16—C17—C13 | 108.4 (7)  |
| C16—Fe1—C14 | 68.0 (3)   | C16—C17—Fe1 | 69.5 (4)   |
| C11—Fe1—C14 | 128.7 (4)  | C13—C17—Fe1 | 69.8 (4)   |
| C9—Fe1—C14  | 117.7 (4)  | C16—C17—H17 | 125.8      |
| C13—Fe1—C14 | 39.9 (4)   | C13—C17—H17 | 125.8      |
| C12—Fe1—C14 | 167.0 (4)  | Fe1—C17—H17 | 126.5      |
| C15—Fe1—C17 | 67.9 (3)   | C8—C7—C18   | 111.0 (5)  |
| C10—Fe1—C17 | 169.2 (3)  | C8—C7—C1    | 114.1 (5)  |
| C16—Fe1—C17 | 40.0 (3)   | C18—C7—C1   | 111.6 (5)  |
| C11—Fe1—C17 | 150.3 (3)  | C8—C7—H7    | 106.6      |
| C9—Fe1—C17  | 130.8 (3)  | C18—C7—H7   | 106.6      |
| C13—Fe1—C17 | 40.0 (3)   | C1—C7—H7    | 106.6      |
| C12—Fe1—C17 | 118.4 (3)  | C2—C1—C6    | 117.3 (6)  |

|               |           |              |            |
|---------------|-----------|--------------|------------|
| C14—Fe1—C17   | 67.2 (3)  | C2—C1—C7     | 120.9 (6)  |
| C15—Fe1—C8    | 167.1 (4) | C6—C1—C7     | 121.9 (6)  |
| C10—Fe1—C8    | 68.3 (3)  | C1—C2—C3     | 122.1 (7)  |
| C16—Fe1—C8    | 129.8 (3) | C1—C2—H2     | 118.9      |
| C11—Fe1—C8    | 68.7 (3)  | C3—C2—H2     | 118.9      |
| C9—Fe1—C8     | 40.6 (2)  | C4—C3—C2     | 119.2 (7)  |
| C13—Fe1—C8    | 118.8 (3) | C4—C3—H3     | 120.4      |
| C12—Fe1—C8    | 41.0 (2)  | C2—C3—H3     | 120.4      |
| C14—Fe1—C8    | 150.9 (4) | O4—C4—C3     | 116.0 (9)  |
| C17—Fe1—C8    | 109.9 (3) | O4—C4—C5     | 123.3 (9)  |
| C9—C8—C12     | 107.3 (6) | C3—C4—C5     | 120.7 (6)  |
| C9—C8—C7      | 128.5 (6) | C3—C4—H4     | 119.6      |
| C12—C8—C7     | 124.0 (6) | C5—C4—H4     | 119.6      |
| C9—C8—Fe1     | 69.0 (4)  | C4—O4—H4O    | 109.5      |
| C12—C8—Fe1    | 69.0 (4)  | C4—C5—C6     | 119.2 (7)  |
| C7—C8—Fe1     | 131.5 (4) | C4—C5—H5     | 120.4      |
| C8—C9—C10     | 107.3 (7) | C6—C5—H5     | 120.4      |
| C8—C9—Fe1     | 70.3 (4)  | C5—C6—C1     | 121.6 (7)  |
| C10—C9—Fe1    | 69.2 (4)  | C5—C6—H6     | 119.2      |
| C8—C9—H9      | 126.3     | C1—C6—H6     | 119.2      |
| C10—C9—H9     | 126.3     | C23—C18—C19  | 118.8 (6)  |
| Fe1—C9—H9     | 125.7     | C23—C18—C7   | 122.6 (6)  |
| C11—C10—C9    | 109.2 (7) | C19—C18—C7   | 118.6 (6)  |
| C11—C10—Fe1   | 70.1 (4)  | C20—C19—C18  | 120.8 (8)  |
| C9—C10—Fe1    | 69.7 (4)  | C20—C19—H19  | 119.6      |
| C11—C10—H10   | 125.4     | C18—C19—H19  | 119.6      |
| C9—C10—H10    | 125.4     | C21—C20—C19  | 120.0 (8)  |
| Fe1—C10—H10   | 126.4     | C21—C20—H20  | 120.0      |
| C10—C11—C12   | 108.1 (6) | C19—C20—H20  | 120.0      |
| C10—C11—Fe1   | 69.9 (4)  | O21—C21—C20  | 129.1 (19) |
| C12—C11—Fe1   | 69.9 (4)  | O21—C21—C22  | 110.8 (18) |
| C10—C11—H11   | 126.0     | C20—C21—C22  | 120.1 (8)  |
| C12—C11—H11   | 126.0     | C20—C21—H21  | 120.0      |
| Fe1—C11—H11   | 125.8     | C22—C21—H21  | 120.0      |
| C11—C12—C8    | 108.2 (7) | C21—O21—H21O | 109.5      |
| C11—C12—Fe1   | 69.4 (4)  | C21—C22—C23  | 120.3 (8)  |
| C8—C12—Fe1    | 70.0 (4)  | C21—C22—H22  | 119.9      |
| C11—C12—H12   | 125.9     | C23—C22—H22  | 119.9      |
| C8—C12—H12    | 125.9     | C18—C23—C22  | 120.1 (7)  |
| Fe1—C12—H12   | 126.2     | C18—C23—H23  | 120.0      |
| C14—C13—C17   | 108.4 (7) | C22—C23—H23  | 120.0      |
| C14—C13—Fe1   | 70.2 (5)  |              |            |
| C8—C7—C18—C23 | −28.7 (7) | C8—C7—C1—C2  | −108.2 (7) |
| C8—C7—C18—C19 | 150.4 (5) | C8—C7—C1—C6  | 71.9 (8)   |
